# Clustering of the structures by using “snakes-&-dragons” approach, or correlation matrix as a signal

Victor P. Andreev<sup>1\*</sup>, Gang Liu<sup>1</sup>, Jarcy Zee<sup>1</sup>, Lisa Henn<sup>1</sup>, Gilberto E. Flores<sup>2</sup>, Robert M. Merion<sup>1</sup>

<sup>1</sup> Arbor Research Collaborative for Health, Ann Arbor, Michigan, United States of America

<sup>2</sup> Department of Biology, California State University, Northridge, California, United States of America

\*Corresponding author

Short title: Clustering of the structures with snakes-&-dragons approach

## Abstract

Biological, ecological, social, and technological systems are complex structures with multiple interacting parts, often represented by networks. Correlation matrices describing interdependency of the variables in such structures provide key information for comparison and classification of such systems. Classification based on correlation matrices could supplement or improve classification based on variable values, since the former reveals similarities in system structures, while the latter relies on the similarities in system states. Importantly, this approach of clustering correlation matrices is different from clustering elements of the correlation matrices, because our goal is to compare and cluster multiple networks – not the nodes within the networks. A novel approach for clustering correlation matrices, named “snakes-&-dragons,” is introduced and illustrated by examples from neuroscience, human microbiome, and macroeconomics.

## 24 Introduction

25           Inherent in our human nature is the desire to group similar objects together to better  
26 understand the world around us. It is easy to compare and group objects characterized by a single  
27 (scalar) attribute. It becomes more complex when an object is characterized by a vector of multiple  
28 attributes, although numerous clustering methods already allow for useful classifications of vectors [1].  
29 A classification task becomes challenging with increasing complexity of the object, for example, where  
30 the interaction of object parts and attributes constitutes important characteristics of an object or a  
31 system. Indeed, some of the most engaging and challenging unresolved questions in biological and social  
32 sciences center on the comparison of functions and structures of complex systems. In this case, a system  
33 can be characterized by a matrix of interdependencies between its parts and attributes. By collecting  
34 data on the attribute levels over time or another dimension resulting in repeated measures, one can  
35 generate correlation matrices that characterize attribute interdependence and reveal important  
36 structural features of the system. In this paper, we aim to extend clustering methods to a task of  
37 comparing and classifying objects characterized by correlation matrices.

38           Existing methods for comparison of correlation matrices were developed mainly in evolutionary  
39 biology and applied to genetic and phenotypic variance-covariance matrices. These methods represent  
40 the differences between two matrices as one number—a similarity measure or a pairwise distance  
41 calculated by random skewers (RS), T-, or S-statistics [2-5]. Briefly, the existing methods to compare  
42 matrices are as follows: Cheverud [3] applied Pielou's "random skewers" (RS) technique [4], which  
43 multiplies target matrices by the same randomly-generated vector ("skewer") and averages results  
44 across numerous realizations of the vector to yield a matrix distance measure. Roff et al [2] proposed  
45 the T-method that measures the distance between matrices using a single summary statistic. More

46 recently, Garcia proposed S-statistics, which estimates matrix distance by comparing the variance  
47 explained by the eigenvectors of each matrix [5]. These reductionist approaches have at least two  
48 limitations: (a) one number cannot adequately represent multidimensional differences; and (b) pairwise  
49 distance admits only hierarchical clustering, while other clustering methods use vectors representing  
50 multidimensional attributes of the object and might better suit the problem.

51 Several other approaches or variations of the above methods have also been proposed, e.g., by  
52 Goodnight and Schwartz, Calsbeek and Goodnight, Phillips and Arnold, and Flury [6-10]. However, these  
53 methods are either only applicable to a specific field of study or make strict assumptions that are not  
54 plausible in many settings. For these reasons, we focus on the distance measures from Roff et al's T-  
55 method [2], Chevruud's random skewers [3], and Garcia's S-statistics [5] for comparison in the current  
56 study.

57 The innovative solution proposed in our paper is to create a novel although intuitively simple  
58 theoretical concept called a "snake" vector (Fig 1a), formed by making a serpentine path through the  
59 off-diagonal terms of the correlation matrix. The "snake" vector captures information on interactions  
60 between attribute variables and thus represents the system structure. Combining "snake" vectors with  
61 various other vectors representing the state of the system, e.g., vector of attribute means and variances,  
62 and overall properties of the system, e.g. number of hubs, connectedness, and small-worldness and the  
63 degree distribution [11] of the corresponding network, yields a concatenated segmental structure. We  
64 term this more complex object a "dragon" vector (Fig 1b) to designate that the analogous structure is  
65 more elaborate than the "snake". Dragon vectors reflect not only the structural properties, but also the  
66 state of the system and allow classification based on multiple types of characterizations of complex  
67 systems. For instance, information on the initial (or average) state of the system can be described as a  
68 vector of the initial (or average) values of its attributes (creating the "head of the dragon"), while the

69 snake formed from the correlation matrix of repeated measures will form the “tail of the dragon”. More  
70 information on the details of the snakes-&-dragons approach is provided in the Methods section.  
71 Importantly, the proposed approach allows the use of a legion of existing methods developed for  
72 clustering of multidimensional vectors.

73 **Fig 1. Explanation of snakes-&-dragons approach.** A-snake vector. B-dragon vector. See details  
74 in the Methods section.

75 The proposed “snakes-&-dragons” approach is illustrated by several examples. First, we  
76 clustered brain connectivity matrices derived from resting state functional magnetic resonance imaging  
77 (fMRI) experiments [12]. Then we clustered correlation matrices describing co-occurrence of the over  
78 10,000 microorganisms in the microbiome of gut, palm, forehead, and tongue regions of 52 students  
79 over seven weeks [13]; and finally we clustered the correlation matrices of macroeconomic  
80 development indicators from over 200 economies collected by the World Bank [14]. We clustered these  
81 correlation matrices using our proposed “snakes-&-dragons” approach and compared results with those  
82 derived from clustering based on existing measures of pairwise distances (random skewers, T- and S-  
83 statistics). We evaluated the quality of clusters by using internal validation criteria comparing within-  
84 cluster variability with between-cluster variability [15-17]. In the cases where the true cluster  
85 membership can be hypothesized, e.g., from the demographic data (for instance young vs. old), or is  
86 known as in the case of the simulated data, we determined misclassification error rates [18], and  
87 compared them using our and other approaches. Next, we examined the number of significantly  
88 different variables across the clusters, testing all the variables used for clustering and other variables  
89 such as demographics. This provides not only the proof of cluster distinctiveness but also the  
90 information about the possible factors driving cluster membership. We believe that the high values of  
91 cluster validation criteria together with the high percentage of significantly different variables across the

92 clusters could illustrate that identified clusters meet the concise definition of clustering given by Liao  
93 [19] as: “identifying structure in an unlabeled data set by objectively organizing data into homogeneous  
94 groups where the within-group-object dissimilarity is minimized and the between-group-object  
95 dissimilarity is maximized.”

## 96 **Materials and methods**

### 97 **Data sets**

98 First, we briefly describe data sets used to illustrate and validate our proposed snakes-&-  
99 dragons approach to clustering correlation matrices.

### 100 **Brain connectivity matrices from old and young healthy subjects**

101 Brain connectivity matrices arise from the observation that the blood oxygen level-dependent  
102 (BOLD) fMRI signal is correlated between spatially separated but functionally related brain regions [20-  
103 21-]. Multiple fMRI studies of resting state brain activity showed that matrices of correlation coefficients  
104 of BOLD signal between brain regions (connectivity matrices) differ in health and disease, especially in  
105 mental disorders [21-22]. Several studies demonstrated changes in brain connectivity matrices related  
106 to aging [23-24]. A pilot data set of brain connectivity matrices used in our study was created at  
107 Washington University in St. Louis. It includes connectivity matrices from 20 healthy subjects older than  
108 60 (#1- #20) and 17 subjects younger than 27 (#21- #37). The data set of older subjects was obtained  
109 with permission from the Washington University Alzheimer’s Disease Research Center and served in  
110 their study as a control group (Clinical Dementia Rating = 0 and CSF biomarker negative). The data set of  
111 younger subjects is the same as used in [25-26] with mean age 23.1 years and range 18-27; all of them  
112 were screened to exclude neurological impairment and use of psychotropic medications. Connectivity  
113 matrices with 36 functional areas were then calculated from the fMRI scans using the Washington

114 University pipeline described in [27]. Then the 37 connectivity matrices were clustered by using our  
115 snake vector approach, without using any demographic information.

116

## 117 Brain connectivity matrices from the Brain Genomics Superstruct Project

118 The Brain Genomics Superstruct Project Open Access Data Release (GSP) is a carefully vetted  
119 collection of neuroimaging, behavior, cognitive, and personality data for 1,570 human participants (ages  
120 18-35)[12]. GSP data include not only demographic data (age, handedness, sex) for all participants, but  
121 also anatomical information on the brain and its regions for each of participants. The 169 brain areas  
122 were divided into 10 networks: visual foveal (VFN), visual peripheral (VPN), dorsal attention (DAN),  
123 motor (MN), auditory (AN), cingulo-opercular (CON), ventral attention (VAN), language (LN), fronto-  
124 parietal (FPN), and default mode (DMN) [26]. Connectivity matrices were calculated from the fMRI scans  
125 using the Washington University pipeline [27] for the first 500 participants of the GSP cohort that had  
126 two BOLD fMRI runs and cognitive behavioral data.

## 127 Microbiome data for healthy college-age adults

128 Flores et al collected longitudinal (10 weeks) data to analyze temporal dynamics of forehead,  
129 gut, palm, and tongue microbial communities among 85 healthy college-age adults from three US  
130 universities [13]. A 49-question demographic, lifestyle, and hygiene survey augmented the weekly  
131 sample collection. Based on relative abundance of over 10,000 microbial species measured as  
132 operational taxonomic units (OTUs) in each sample, investigators found high variability in the  
133 microbiome over time. In our study, we aim to characterize the temporal changes in the microbiome by  
134 exploring correlations between weekly samples of microbiomes within each individual. By clustering

135 individuals' correlation matrices, we identified subgroups of students representing different patterns of  
136 microbiome dynamics.

137

## 138 **Macroeconomics development indicators from the World Bank**

139           Since 1960, the World Bank has collected 1,500 yearly macroeconomic development indicators  
140 from over 200 economies, including: 1) gross domestic product (GDP), 2) unemployment, 3) inflation, 4)  
141 net trade in goods, 5) labor force participation, 6) foreign direct investment, and 7) gross domestic  
142 savings [14]. As a proof-of-concept example, we used the time series data on the seven indicators to  
143 create 7-by-7 correlation matrices for each of the 200 economies and then clustered them by using  
144 snake vectors.

145

## 146 **Analytical methods**

147           In this paper, we compare and cluster correlation matrices from the above four data sets by  
148 using existing methods for matrix comparison and our novel “snakes-&-dragons” approach.

149

### 150 **Existing methods to compare matrices: random skewers, T-statistic, S-statistic**

151           Approaches to compare and calculate distances between matrices were developed in  
152 evolutionary biology and might be unfamiliar to researchers outside of that field. Therefore, we briefly  
153 describe three of the existing approaches used in this paper: random skewers (RS), T-statistic, and S-  
154 statistics. The RS procedure samples from a uniform [-1, 1] distribution to form random vectors [28].  
155 Multiplying correlation matrices by these vectors yields response vectors. If the compared correlation

156 matrices are similar, the responses to the same selection vector should be similar as well. The  
157 correlation among response vectors is averaged over multiple random vectors—100 replicates in our  
158 example—to estimate similarity between two objects. Another method for comparing matrices is the T-  
159 statistic [2], describing dissimilarity between two matrices as the sum of the absolute differences  
160 between corresponding matrix elements. The third method is the so-called S-statistic [5]. Garcia  
161 introduced three S-statistics to represent the divergence between two correlation matrices, all based on  
162 the idea that if two covariance matrices are similar, an eigenvector set resulting from principal  
163 component analysis (PCA) of one matrix will explain a similar amount of variation in the other matrix.  
164 We considered the first, S1, which Garcia described as a general measure of differentiation,  
165 characterizing the ability of eigenvectors from one sample to explain the variation in the other sample.  
166 By contrast, S2 compares orientation of eigenvectors of the same ordinal position in the two sets and S3  
167 evaluates differences in shape of eigenvectors in the same ordinal position between the two sets. We  
168 performed hierarchical clustering based on the resulting similarity matrices.

## 169 Creating “snakes-&-dragons”

170 We propose to extract details from correlation matrices into a new object that we call a “snake”  
171 vector. The “snake” vector forms from a serpentine path through the off-diagonal terms of a correlation  
172 matrix and captures information on interactions of the variables, i.e., the system structure (Fig 1a).  
173 Many methods exist for clustering of vectors, allowing for the choice of the optimal clustering method  
174 for a given data set or problem. To augment and complement the information on the structure of the  
175 systems with the information on the state of the systems, we additionally introduce the class of objects  
176 that we call “dragon vectors” or “dragons”. Here we suggest four types of dragons. Dragon 1 integrates  
177 state descriptors and structural descriptors by concatenating the snake vector with a vector of variable  
178 means and a vector of variable variances (Fig 2a). Dragon 2 (Fig 2b) integrates structural descriptors



179 with overall network property information. While the snake vector contains individual correlations  
180 between system attributes or between nodes of a network to represent structural descriptors, measures  
181 of network integration can describe the system in a different way. For example, average connectivity,  
182 number of nodes/hubs, average or shortest path length, or number of first neighbors have previously  
183 been used to characterize networks [11, 29-30]. These measures can be concatenated with the snake  
184 vector to form a dragon for clustering. Dragon 3 (Fig 2c) is created by combining correlations along  
185 multiple dimensions or locations. We used this approach in the analysis of the microbiome data set,  
186 which contains measures of microbial OTUs at four sites on the human body at several time points in  
187 many subjects. The correlation matrix for each body site yields a different snake vector. By  
188 concatenating multiple snakes, all data descriptions can influence the clustering. Similarly, Dragon 4 (Fig  
189 2d) can be created by combining different types of data, e.g., correlation matrices of clinical,  
190 transcriptomic, proteomic, and metabolomic variables derived from repeated measures combined with  
191 the genomics data and baseline demographics and clinical data, which would create the “head” of the  
192 “dragon”. While snake vectors can be clustered as they are, since the elements of the correlation  
193 matrices are always in the range from -1 to 1, dragon vectors require several refinements prior to  
194 processing. First, clustering algorithms often gravitate toward elements of greater magnitude. We thus  
195 put all variables on a common scale to ensure all variables can fairly influence the decision-making.  
196 When a data set has a natural comparison group, e.g., with cases and controls, observations on cases  
197 can be centered and scaled using the mean and standard deviation of the corresponding variable among  
198 controls. In the absence of such a control group, as in this study, we center variables by each variable’s  
199 mean and scale by the square root of its average variance. Additionally, cluster results should not be  
200 affected by including variables reflecting redundant information. To mitigate that prospect, we suggest  
201 performing PCA on the matrix of assembled dragon vectors and then clustering based on the principal  
202 components.

203 **Fig. 2. Four types of dragon vectors.** A-Dragon 1, includes means and variances of the variables. B-  
204 Dragon 2, includes also overall network property information. C- Dragon 3, combines correlations along  
205 multiple dimensions of the data matrix or multiple locations. D-Dragon 4 is composed of several dragons  
206 presenting different types of clinical and omics data.

## 207 Clustering methods

208 Many clustering methods exist, including k-means clustering, fuzzy k-means clustering,  
209 hierarchical clustering, k-medoids, affinity propagation, and others [1]. Choosing among algorithms and  
210 choosing the number of clusters is often achieved using internal validation statistics, such as Calinski,  
211 silhouette, or connectivity [15-16]. None of the clustering methods is ideal in all settings, and the  
212 optimal choice depends on the underlying data's properties, which is not always recognized by the users  
213 of clustering algorithms. For example, Dolnicar found that clustering studies typically do not match data  
214 conditions with clustering methodology, but instead just use Ward's hierarchical and k-means clustering  
215 [31]. Halkidi et al noted that many studies omit cluster validation, despite its importance and the  
216 availability of tools for implementation [17]. They suggested that new clustering algorithm development  
217 should include simulated data sets that mimic the properties of biological data to allow for controlled  
218 study of an algorithm's sensitivity. Our group recently compared three clustering methods—hierarchical,  
219 k-means, and k-medoids—using simulated targeted proteomics data [18]. We demonstrated that k-  
220 means had the lowest misclassification error for identifying biomarker signatures, but also that results  
221 varied with different correlations between biomarker levels. The study illuminated the importance of  
222 the structure of the correlation matrix of the variables in determining the optimal clustering method  
223 [18].

224 Clustering in this study is performed using a resampling-based consensus clustering method  
225 introduced by Monti et al [32]. As implemented in our study, this method can be briefly described as

226 follows. We performed 1,000 instances of random samplings with replacement, each selecting a subset  
227 including 80% of N objects (snake or dragon vectors under study). We then partitioned each of the  
228 subsets into clusters using a k-means clustering algorithm (implemented as the MATLAB® function  
229 kmeans; MathWorks, Natick, MA) with k value scanned from 2 to 8. Then the N x N consensus matrix  
230 was created representing the results of these 1,000 partitions. Each element of the matrix represented  
231 the proportion of times that the two objects were included in the same cluster, i.e., the ratio of the  
232 number of times a given pair of objects were included in the same cluster to the number of times both  
233 of the objects were selected in the random 80% subset. Therefore, each element of the matrix can be  
234 interpreted as a probability that two objects belong to the same cluster. Hierarchical clustering (using  
235 MATLAB® function clustergram) was then performed using elements of the consensus matrix as the  
236 distance measure between objects. Resulting clusters (for each scanned value of k) were then examined  
237 by using Calinski's "quality of clustering" criterion, which compared the between-cluster differences  
238 with the within-cluster differences and allowed determination of the optimal number of clusters [15].

239 For RS, T-, and S- statistics, hierarchical clustering was used since it is the only method that can  
240 work with these measures of pairwise distances between objects (vectors, matrices). Hierarchical  
241 clustering was performed using the clustergram MATLAB function with the Ward distance option.

242

## 243 **Simulating correlation matrices with a controlled noise level**

244 When working with real data, one disadvantage is that the true cluster membership is not  
245 known, so it might be difficult to evaluate the misclassification error rate. Thus, in order to evaluate  
246 clustering of connectivity matrices using snake vectors, we created simulated data that had clear  
247 "labels" (e.g., older or younger brain connectivity matrices). In this study, we selected two substantially

248 different brain connectivity matrices, #1 and #29, as representatives of old and young brains,  
249 respectively (from the 37 healthy young and old subjects pilot data set described above). Based on these  
250 two prototype matrices, we simulated two matrix classes by adding a controlled amount of noise. Since  
251 correlation matrices need to satisfy certain conditions (i.e., being a positive-semidefinite matrix), we  
252 cannot just add noise to each component of the matrix. Instead, we used the procedure suggested by  
253 Schafer et al, which simulates noise by repeatedly sampling from multivariate normal distributions with  
254 given standardized covariance matrices [33]. Briefly: we take the  $q \times q$  brain connectivity matrix and use  
255 it as a covariance matrix to simulate the multivariate normal distribution from which we sample  $n$  times  
256 to generate a  $q \times n$  data matrix. Then, we calculate the  $q \times q$  correlation matrix from this data matrix.  
257 The higher the  $n$  the closer the new correlation matrix to the original connectivity matrix will be.  
258 Decreasing  $n$  may be viewed as adding noise, since the role of randomness is higher when the normal  
259 distribution is sampled more sparsely. This procedure allows the amount of noise to vary by changing a  
260  $q/n$  ratio, where  $q$  is the number of variables (here number of brain regions  $q=36$ ) and  $n$  the number of  
261 times the multivariate normal distribution is sampled to create a data matrix used to calculate the  
262 correlation matrix. Importantly, each time we randomly sample the multivariate normal distribution, we  
263 get a different  $q \times n$  data matrix and the  $q \times q$  correlation matrix, even for the same value of  $n$ . Fig 3  
264 shows single instances of simulated correlation matrices when the  $q/n$  ratio is set to 0.1, 3, 6, 9, and 12  
265 for brain connectivity matrix #1. The similarity of the simulated matrices with the original prototypic  
266 connectivity matrix #1 is clearly decreasing.

267 **Fig 3. Simulating connectivity matrices with increased noise level.** A-original matrix #1. B –  
268 simulated matrix with  $q/n=0.1$ ,  $n=360$ ; C –  $q/n=3$ ,  $n=12$ ; D-  $q/n=6$ ,  $n=6$ ; E- $q/n=9$ ,  $n=4$ ; F-  $q/n=12$ ,  $n=3$ .  
269

270 Figs 4a-b demonstrate how the instances of simulated correlation matrices differ from each  
 271 other for given values of  $n$ . As seen, the variability across the instances is higher the lower the  $n$ . To test  
 272 and compare the performance of the snake vector approach with the existing measures of matrix  
 273 dissimilarity, we simulated 20 such matrices for each value of the  $q/n$  ratio for prototypic old and  
 274 prototypic young brain connectivity matrices (#1 and #29) and conducted clustering on the 40 simulated  
 275 connectivity matrices for each  $q/n$  value. This enabled us to compare the ability of the various  
 276 clustering methods to correctly classify the correlation matrices as young or old in the presence of an  
 277 increased level of noise. To make better sense of what  $q/n$  means in terms of added noise and variability  
 278 of the simulated connectivity matrices, we calculated the histograms of standard deviations of the  
 279 elements of the simulated connectivity matrices for various  $q/n$  values (shown in Fig 5a). Clearly,  
 280 standard deviations are higher for larger  $q/n$  values. Then, we defined the signal/noise ratio (SNR)  
 281 describing difference between two clusters of correlation matrices as follows:

$$282 \quad SNR = \frac{\sqrt{\sum_i^N (\bar{a}_i - \bar{b}_i)^2}}{\frac{1}{M_1 + M_2} \left( \sum_{m=1}^{M_1} \sqrt{\sum_1^N (a_{i,m} - \bar{a}_i)^2} + \sum_{m=1}^{M_2} \sqrt{\sum_1^N (b_{i,m} - \bar{b}_i)^2} \right)}, \quad (\text{eq. 1})$$

283 where  $N$  is the length of snake vectors,  $\bar{a}_i$  is the  $i$ -th element of the average snake vector for cluster 1,  $\bar{b}_i$   
 284 is the  $i$ -th element of the average snake vector for cluster 2,  $M_1$  is the number of simulated matrices in  
 285 cluster 1,  $M_2$  is the number of simulated matrices in cluster 2,  $a_{i,m}$  is the  $i$ -th element in the snake  
 286 vector obtained from  $m$ -th simulated correlation matrix and  $b_{i,m}$  is the  $i$ -th element in the snake vector  
 287 obtained from  $m$ -th simulated correlation matrix. Note that the numerator in eq. 1 is the Euclidian  
 288 distance between the centroids of the two clusters, which is equal to the distance between the snake  
 289 vectors of the prototypic connectivity matrices, while the denominator is the measure of the average  
 290 within cluster Euclidian distances. Fig 5b demonstrates how SNR defined by (eq.1) depends on the  $q/n$   
 291 value.

292

293 **Fig 4. Increased variability of simulated correlation matrices with increased  $q/n$  value.** A-3  
294 instances of correlation matrices generated from the connectivity matrix #1 using  $q/n=2$ ,  $n=18$ ; B-3  
295 instances of correlation matrices generated from the connectivity matrix #1 using  $q/n=12$ ,  $n=3$ . See how  
296 variability of the matrices is increased in B ( $q/n=12$ ) versus A ( $q/n=2$ ).

297 **Fig 5. Explanation of increased variability of the simulated matrices.** A- histograms of standard  
298 deviations of the elements of the simulated connectivity matrices for various  $q/n$ ; B- signal to noise ratio  
299 vs.  $q/n$ .

## 300 Statistical Tests

301 The statistical tests for differences across clusters in this paper include Chi-square tests  
302 (MATLAB® function `crosstab`) for categorical data, analysis of variance (ANOVA, MATLAB® function  
303 `anova1`) for continuous data that follow a normal distribution, and the Kruskal-Wallis test (MATLAB®  
304 function `kruskalwallis`) for continuous data that do not follow a normal distribution. We controlled for  
305 the false discovery rate from multiple hypothesis testing using the Benjamini-Hochberg procedure  
306 (MATLAB® function `mafdr`).

## 307 Results and discussion

308 Here we demonstrate the results of cluster analysis of the four data sets described above by  
309 using the snakes-&-dragons approach. In clustering brain connectivity matrices from the 37 young and  
310 old healthy subjects pilot data set and the GSP data set, we provide not only the results of clustering but  
311 also the comparison with existing methods of correlation matrix comparison (RS, T-, and S-statistics),  
312 and evaluation of the quality of clustering. The microbiome example serves to illustrate the use of the

313 dragon concept and demonstrates the Dragon 3 vector described above. The World Bank example  
314 demonstrates the broadness of the snakes-&-dragons approach and its applicability outside of the  
315 biomedical field.

316

## 317 Brain connectivity matrices. Conventional measures vs. clustering of the snakes

318 The pilot data set of brain connectivity matrices of young and old healthy subjects was first used  
319 to examine the existing methods of matrix comparison. Pairwise distances between 37 brain  
320 connectivity matrices were determined by using RS, T-, and S-statistics. Then, hierarchical clustering was  
321 performed using the pairwise distances. The resulting dendrograms are presented in Fig 6; Fig 6a  
322 presents clustering based on RS, 6b on T-statistics, and 6c on S-statistics, while Fig 6d presents the  
323 results of hierarchical clustering of snake vectors. Dendrograms differ for the above four approaches,  
324 although all of them define two large clusters. Assuming that the true cluster membership is determined  
325 by the age of the participants, with 20 old participants and 17 young, we can calculate confusion  
326 matrices (Fig 6e-6h) as well as the misclassification error rate (Table 1) for each of the dendrograms.  
327 Note that the misclassification error is the lowest when the snake vector approach is used. Interestingly,  
328 however, the snake vector approach clustered three older brains (#10, 12, and 16) into the younger  
329 brain group, while all 17 young brains were correctly clustered together (Fig 6d). Notably, the use of  
330 random skewers also resulted in clustering of these three brains into the younger group (Fig 6a), while  
331 the use of the T-statistic clustered brain #10 into the younger group, and using the S-statistic clustered  
332 both brains #10 and #16 into the younger group. The problem with clustering real data is that one never  
333 knows the true class membership. Given the consensus between the four methods with regard to brain

334 #10 and the consensus of three methods with regard to brain #16, it is possible that these brains  
335 preserved the properties of the young brains due to genetic or lifestyle factors despite their older age.

336 **Table 1. Misclassification error of four clustering approaches in the pilot data set of brain connectivity**  
337 **matrices of young and old healthy subjects.**

| Method                                   | Old Group | Young Group | Misclassification Error |
|------------------------------------------|-----------|-------------|-------------------------|
| True Demographics                        | 20        | 17          | --                      |
| Random Skewers + Hierarchical Clustering | 14        | 23          | 16.22%                  |
| T-statistic + Hierarchical Clustering    | 21        | 16          | 13.51%                  |
| S-Statistic + Hierarchical Clustering    | 15        | 22          | 24.32%                  |
| <b>"Snake" Vector + Hierarchical</b>     | <b>17</b> | <b>20</b>   | <b>8.10%</b>            |

338 **Fig 6. Clustering of brain connectivity matrices from pilot data set of young vs. old healthy**  
339 **persons.** A-dendrogram based on RS, B-dendrogram based on T-statistics, C-dendrogram based on S-  
340 statistics, D-dendrogram based on snake vectors, E-H- confusion matrices for the above four  
341 approaches.

342 In order to further evaluate the quality of clustering with the snakes approach, we used the  
343 simulated data created from the prototypical young (#29) and old (#1) brain connectivity matrices, as  
344 described in the Methods section. Note that brains #29 and #1 are distinctly different according to  
345 dendrograms from all four clustering methods (Fig 6). Since we know the true cluster memberships for  
346 the simulated data, we can calculate misclassification error for each clustering algorithm (Fig 7). Here in  
347 addition to using hierarchical clustering with RS, T- and S-statistics, and snake vectors, we examined the  
348 use of snake vectors with k-means clustering and with resampling-based consensus clustering (as  
349 described in Methods section). Misclassification errors up to  $q/n = 4$  ( $\text{SNR} \geq 1.203$  as defined by eq. 1) are  
350 all zero for all methods. For  $q/n > 6$  ( $\text{SNR} < 0.956$ ), clustering correlation matrices using snake vectors  
351 outperforms the existing methods by having the lowest misclassification error rates, regardless of the



352 clustering method used. The best performance is demonstrated by consensus clustering of snake  
353 vectors due to higher robustness to the added random noise.

354 **Fig 7. Misclassification error in clustering simulated connectivity matrices.** Comparison of  
355 hierarchical clustering results for RS, T- and S-statistics, and snakes vectors, with k-means and  
356 resampling-based consensus clustering using snake vectors. Snake vectors based approaches  
357 outperform RS, T- and S-statistics based ones.

358

### 359 Clustering of 500 brain connectivity matrices from the GSP project

360 Next, we applied our snake vectors approach to the clustering of 500 brain connectivity matrices  
361 from the GSP project. To cluster snake vectors derived from the connectivity matrices we used the  
362 resampling-based consensus clustering method as described in the Methods section. Fig 8a presents the  
363 heat map for the 500 x 500 consensus matrix. Each element of the matrix provides the probability that  
364 two brain connectivity matrices belong to the same cluster. Consensus clustering identified two distinct  
365 clusters with sample sizes  $N_1=160$  and  $N_2=340$ . Use of the Calinski criterion also confirmed the number  
366 of clusters as two (Fig 8b).

367 **Fig 8. Resampling-based consensus clustering of 500 brain connectivity matrices from GSP**  
368 **project.** A- Consensus matrix. Two identified clusters are presented as yellow squares (yellow color  
369 indicating the high probability of a pair of brains belonging to the same cluster). High contrast in the on-  
370 diagonal and off-diagonal values of probability indicate two clusters. B- Checking the number of clusters  
371 with Calinski criterion. Calinski criterion have a maximum at  $k=2$  indicating two clusters as well (both  
372 with snakes-&-dragons approach and with RS, T- and S-statistics).

373 Table 2 presents some anatomical and demographic variables of interest describing GSP  
 374 participants but not used for clustering. Eight out of 81 such variables were significantly different across  
 375 the two clusters; two of the variables remained significantly different after the correction for multi-  
 376 testing (FDR corrected p-values < 0.05) [34]. Ethnicity was significantly different (FDR corrected p-value =  
 377 0.004) between the two clusters and sex was borderline significant (FDR corrected p-value = 0.055 and  
 378 uncorrected p-value = 0.006), with cluster 2 having more white and female participants. Right vs. left  
 379 handedness was not significant ( $p=0.9$ ).

380 **Table 2. Anatomical and demographic variables of interest describing GSP participants but not used**  
 381 **for clustering**

|                                                        | Cluster 1<br>(n =160 ) | Cluster 2<br>(n = 340) |         |                    |
|--------------------------------------------------------|------------------------|------------------------|---------|--------------------|
| Variables                                              |                        |                        | p-value | FDR<br>corrected p |
| Age                                                    | 21.113(±2.63)          | 21.335(±2.79)          | 0.304   | 0.607              |
| Race/ethnicity                                         |                        |                        | <0.001  | 0.004              |
| White not Hispanic                                     | 83 (51.9%)             | 233 (68.5%)            |         |                    |
| Other                                                  | 77 (48.1%)             | 107 (31.5%)            |         |                    |
| Sex                                                    |                        |                        | 0.006   | 0.055              |
| Female                                                 | 81 (50.6%)             | 216 (63.5%)            |         |                    |
| Male                                                   | 79 (49.4%)             | 124 (36.5%)            |         |                    |
| Education                                              | 14.231(±1.73)          | 14.400(±1.72)          | 0.234   | 0.575              |
| Handness                                               |                        |                        | 0.906   | 0.947              |
| Right                                                  | 145 (91.2%)            | 304 (89.9%)            |         |                    |
| Left                                                   | 14 (8.8%)              | 34 (10.1%)             |         |                    |
| Right superior frontal thickness (mm)                  | 2.768(±0.13)           | 2.798(±0.12)           | 0.005   | 0.047              |
| Estimated total intracranial volume (cm <sup>3</sup> ) | 1558.487(±146.8)       | 1533.709(±140.0)       | 0.027   | 0.191              |
| Right hemisphere average cortical thickness (mm)       | 2.499(±0.07)           | 2.514(±0.08)           | 0.027   | 0.191              |
| Left hemisphere hippocampal volume (mm <sup>3</sup> )  | 4490.225(±428.8)       | 4420.709(±411.2)       | 0.028   | 0.191              |
| Right hemisphere hippocampal volume (mm <sup>3</sup> ) | 4511.075(±446.0)       | 4441.971(±411.9)       | 0.037   | 0.231              |
| Left inferiorparietal thickness (mm)                   | 2.434(±0.12)           | 2.455(±0.11)           | 0.04    | 0.232              |

382           Even more interesting is the comparison across the clusters of the variables that were used for  
383 clustering, i.e., the elements of the connectivity matrices. Fig 9a presents the average connectivity  
384 matrix for cluster 1 and Fig 9b for cluster 2. Fig 9c provides mean differences between connectivity  
385 matrices averaged across brains in cluster 2 and brains in cluster 1, while Fig 9d indicates by black dots  
386 which of the differences were significant (FDR corrected p-value < 0.05). A total of 8395 (out of 14196)  
387 elements of the connectivity matrices were significantly different even after the FDR correction for  
388 multi-testing [34]. Importantly, most of the significantly different elements of the connectivity matrices  
389 were not randomly distributed; they are rather concentrated within known brain subnetworks (defined  
390 in the Methods section and Fig 9 caption). Average correlation within the default mode network is  
391 significantly and substantially (over 26%) higher in cluster 2 than cluster 1, while the motor network is  
392 26% more highly correlated in cluster 1 than cluster 2. Multiple average correlations between the known  
393 subnetworks were significantly different (FDR corrected p-value < 0.05) between cluster 1 and 2 as well,  
394 as shown in Table 3, e.g., VFN and CON are almost 215% more correlated in cluster 2 than in cluster 1.  
395 Importantly, the use of the snake vector approach allows identification of these distinctly different  
396 clusters.

397 **Table 3. Significant differences in brain connectivity matrices are located mostly in the below**  
398 **subnetworks. Mean Difference:  $c_2 - c_1$ . Relative Difference:  $R = (c_2 - c_1) / c_1$ , where  $c_1$  and  $c_2$  are the values**  
399 **of connectivity (correlation coefficients) averaged across the subnetworks in cluster 1 and cluster 2.**

|         | Mean Difference | Relative Difference |
|---------|-----------------|---------------------|
| VFN-CON | 0.0842          | 214.71%             |
| VPN-CON | 0.0552          | 183.38%             |
| DAN-CON | 0.103           | 104.02%             |
| DAN-LN  | -0.0952         | -90.19%             |
| DAN-DMN | -0.0836         | -37.66%             |
| MN      | -0.0715         | -26.80%             |
| MN-CON  | 0.1002          | 111.14%             |
| MN-LN   | -0.0614         | -296.64%            |
| AN-CON  | 0.0829          | 47.57%              |
| AN-LN   | -0.0744         | -559.04%            |
| CON-LN  | 0.0558          | 263.66%             |
| CON-DMN | -0.0866         | -45.16%             |
| DMN     | 0.0897          | 26.82%              |

400 **Fig 9. Mean brain connectivity matrices for two clusters identified in GSP data.** A- Mean  
401 connectivity matrix for cluster 1, B- Mean connectivity matrix for cluster 2, C- Difference of mean  
402 connectivity matrices for cluster 2 and cluster 1, D- 8395 significantly different values of connectivity  
403 observed in cluster 1 vs. cluster 2. The 169 brain areas were divided into 10 networks: visual foveal  
404 (VFN), visual peripheral (VPN), dorsal attention (DAN), motor (MN), auditory (AN), cingulo-opercular  
405 (CON), ventral attention (VAN), language (LN), fronto-parietal (FPN), and default mode (DMN) [26].

406 [Using snakes-&-dragons for clustering of microbiomes of healthy college-age](#)  
407 [adults](#)

408 For the microbiome data described in [13] and briefly in the Methods section, we calculated the  
409 correlations across OTU counts observed at seven time points (weeks) at four body sites (gut, tongue,  
410 palm, and forehead) to explore the temporal changes in each subject's microbiome. We created 7x7

411 correlation matrices for each person and each body site to represent the similarities between the  
412 observed seven weeks in terms of the microbiome composition. We then conducted a cluster analysis  
413 using these correlation matrices and our snake vectors approach to identify subgroups of individuals  
414 sharing similar patterns of microbiome changes over time. We used three approaches to compare the  
415 above correlation matrices: 1) we clustered individuals by using data only from the gut and explored the  
416 correlation matrices for the other three sites; 2) we clustered the individuals using data from the gut,  
417 tongue, palm, and forehead separately; 3) we created dragon vectors by concatenating snake vectors  
418 for the gut, tongue, palm, and forehead and then clustered these dragon vectors. Analyses were  
419 performed on 52 students (out of 85 total) who provided samples from all four body sites for at least  
420 seven consecutive weeks. Figs 10-11 present the correlation matrices averaged across the members of  
421 the identified clusters. Note that students were clustered not by the composition of their microbiome,  
422 but rather by the pattern of change of their microbiomes over time, i.e., the dynamics of their  
423 microbiomes.

424 Fig 10 illustrates the first approach, where clustering is based on gut microbiome data, which  
425 resulted in three clusters named Gut 1 (n=9), Gut 2 (n=16), and Gut 3 (n=27). As seen in Fig 10a, for  
426 students in cluster Gut 1, the gut microbiome was highly correlated during weeks 2 through 5, while at  
427 weeks 1 and 6 their microbiomes were quite different from other weeks. There seems to have been  
428 some abrupt changes in the gut microbiomes of these students during weeks 1 and 6. For students in  
429 cluster Gut 2, the gut microbiome was moderately correlated across all 7 weeks and the level of  
430 correlation between the adjacent weeks was slightly oscillating in time. Students in cluster Gut 3 had  
431 stable gut microbiomes that did not change much over time. Comparison of the correlation matrices of  
432 tongue, palm, and forehead microbiomes for the Gut 1, 2, and 3 clusters (Figs 10b-10d) demonstrates  
433 that forehead and tongue microbiomes were relatively stable over time for all gut-based clusters, while

434 the palm microbiome was less correlated over time. This is not surprising since palm microbiome  
435 communities are most affected by the environment in daily life.

436 **Fig 10. Correlation matrices reflecting microbiome dynamics at four body sites (gut, tongue,**  
437 **palm, and forehead) for three clusters of students identified based on the gut microbiome data.**

438 In the second analysis, we clustered individuals based on the data from each of the four sites  
439 separately. The correlation matrices for each site averaged across each cluster are shown in Fig 11. We  
440 have identified three clusters in each of the four sites. Among these three clusters for each site, we have  
441 one cluster that has generally large correlation across all the weeks and one cluster that has relatively  
442 small correlation across all the weeks. We also have one or two clusters for each site that has one or two  
443 weeks that are quite different from the others; it is most pronounced in Gut 1, but is also present in  
444 Palm 1, Palm 2, Forehead 1, and Tongue 1. These peculiar weeks vary from site to site, which  
445 demonstrates different dynamics of the temporal evolution of microbial communities over the seven  
446 weeks.

447 **Fig 11. Correlation matrices reflecting microbiome dynamics at four body sites (gut, tongue,**  
448 **palm, and forehead) for three clusters of students identified based on the microbiome data for each**  
449 **of the body sites.**

450 Fig 12 provides Sankey diagrams for pairwise comparison of cluster membership across the  
451 four body sites. Note that cluster membership was similar when clustering was based on gut and  
452 tongue microbiomes—the most similar clusters being Gut 3 and Tongue 3.

453 **Fig 12. Pairwise comparison of cluster membership across four body sites.**

454 In the third analysis, we clustered individuals using data from all four sites together. For each  
455 individual, we concatenated snakes from each site (forehead, tongue, gut, and palm) to form a “dragon”  
456 vector. We found three clusters: Body 1, 2, 3 (Fig 13a) with 12, 18, and 22 subjects in each cluster. For  
457 cluster Body 1, only the tongue microbiomes were highly correlated over time. For cluster Body 2, both  
458 tongue and gut microbiomes were highly correlated, while only the forehead microbiome was highly  
459 correlated over time for cluster Body 3. These results suggest the existence of subtypes representing  
460 different dynamics of microbial communities throughout the body. Sankey diagrams (Fig 13b)  
461 demonstrate that the cluster Body 3 is similar in membership to Forehead 2 and is driven by the high  
462 temporal stability of the forehead microbiome in this cluster. Cluster Body 2 is mostly formed by the  
463 members of the Tongue 3 cluster with highly stable tongue microbiome, and cluster Body 1 includes  
464 members of various site-specific clusters.

465 **Fig 13. Clustering based on dragon vectors describing microbiomes of four body sites.** A-Mean  
466 dragon vectors for three clusters of students identified by clustering the concatenated snake vectors for  
467 gut, tongue, palm, and forehead. B-Sankey diagrams comparing cluster membership based on the  
468 dynamics of microbiomes at each site and all four sites’ microbiomes combined.

469 Table 4 provides overall microbiome, demographic, and behavioral data for each of the clusters  
470 identified in the above analyses, allowing interpretation and providing possible reasons for the  
471 similarities and differences in the patterns of microbiome dynamics. Note that the actual microbiomes  
472 within the clusters could be quite different while the patterns of microbiome dynamics are similar. The  
473 top three rows of the table characterize the diversity of the microbiome within the given site averaged  
474 across the members of each cluster. The total number of OTUs (which can serve as one of the measures  
475 of microbiome diversity) was calculated by counting the OTUs that were observed in a sample from any  
476 week for each student and then averaged across all the students in the given cluster and rounded to the

477 closest integer. Each OTU was counted only once even if it was observed at multiple weeks. Another  
478 important measure of diversity is the Shannon Index (SI), defined as  $SI = -\sum_{i=1}^R r_i \ln r_i$ , where  $r_i$  is the  
479 measure of relative abundance of the given OTU, i.e., the ratio of the abundance of the given OTU to the  
480 abundance of all observed OTUs, and  $R$  is the total number of observed OTUs for the given sample. The  
481 values of the SI for each student, site, and week from the supplementary data of [13] were averaged  
482 across the weeks and across the members of the identified clusters. The SI characterizes the diversity of  
483 the microbiome by taking into account not only the number of OTUs but their abundances as well [35].  
484 Higher values of the index describe diverse populations; lower values of the index describe populations  
485 dominated by a single taxon (OTU). In the case of a single taxon,  $SI=0$ , while in the case of all taxa (OTUs)  
486 being represented equally  $SI= \ln(R)$ . In order to simplify the comparison of sites and students with  
487 different numbers of OTUs, we also calculated the normalized SI equal to  $SI/\ln(R)$ , which has the  
488 maximum possible value of one and minimum of zero.



**Table 4. Overall microbiome diversity with any bias for data 2018. Each original cluster is based on dynamics of a) gut microbiome, b) tongue microbiome, c) palm microbiome, d) forehead microbiome, e) four sites microbiome.**

| Gut-based clusters              |                |                 |                 |               |               |
|---------------------------------|----------------|-----------------|-----------------|---------------|---------------|
| Variables                       | Gut 1 (n=9)    | Gut 2 (n=16)    | Gut 3 (n=27)    | p value       | Corrected p   |
| <b>Number of OTUs</b>           | 969            | 1053            | 1042            | 0.2632        | 0.3948        |
| <b>Shannon Index</b>            | 4.687          | 5.125           | 5.275           | <b>0.014</b>  | 0.0652        |
| <b>Normalized Shannon Index</b> | 0.817          | 0.871           | 0.883           | <b>0.029</b>  | 0.0652        |
| <b>Age</b>                      | 20.778         | 25.438          | 23.962          | 0.1416        | 0.2549        |
| <b>BMI</b>                      | 22.915         | 22.446          | 23.077          | 0.7402        | 0.7737        |
| <b>Gender</b>                   |                |                 |                 | 0.7468        | 0.7737        |
| Female                          | 6 (67%)        | 10 (63%)        | 14 (54%)        |               |               |
| Male                            | 3 (33%)        | 6 (37%)         | 12 (46%)        |               |               |
| <b>Race /Ethnicity</b>          |                |                 |                 | <b>0.0148</b> | 0.0652        |
| Caucasian                       | 4 (44%)        | 14 (93%)        | 22 (81%)        |               |               |
| Hispanic                        | 1 (11%)        | 1 (7%)          | 3 (11%)         |               |               |
| Other                           | 4 (44%)        | 0 (0%)          | 2 (7%)          |               |               |
| <b>University</b>               |                |                 |                 | <b>0.0251</b> | 0.0652        |
| UCB                             | 6 (67%)        | 6 (38%)         | 14 (52%)        |               |               |
| NAU                             | 0 (0%)         | 5 (31%)         | 12 (44%)        |               |               |
| NCS                             | 3 (33%)        | 5 (31%)         | 1 (4%)          |               |               |
| <b>Use of Facial Cosmetics</b>  |                |                 |                 | 0.7737        | 0.7737        |
| Never                           | 4 (44%)        | 5 (31%)         | 9 (33%)         |               |               |
| Rarely                          | 0 (0%)         | 3 (19%)         | 4 (15%)         |               |               |
| Occasionally                    | 1 (11%)        | 1 (6%)          | 0 (0%)          |               |               |
| Regularly                       | 1 (11%)        | 1 (6%)          | 2 (7%)          |               |               |
| Daily                           | 3 (33%)        | 6 (38%)         | 12 (44%)        |               |               |
| Tongue-based clusters           |                |                 |                 |               |               |
| Variables                       | Tongue 1 (n=5) | Tongue 2 (n=10) | Tongue 3 (n=37) | p value       | Corrected p   |
| <b>Number of OTUs</b>           | 364            | 380             | 326             | 0.1945        | 0.3501        |
| <b>Shannon Index</b>            | 3.424          | 4.002           | 4.156           | <b>0.0015</b> | <b>0.0135</b> |
| <b>Normalized Shannon Index</b> | 0.819          | 0.800           | 0.699           | <b>0.0033</b> | <b>0.0146</b> |
| <b>Age</b>                      | 21.000         | 23.000          | 24.459          | 0.3152        | 0.4301        |
| <b>BMI</b>                      | 25.878         | 23.613          | 22.231          | 0.1121        | 0.2522        |
| <b>Gender</b>                   |                |                 |                 | 0.9759        | 0.9759        |
| Female                          | 3 (60%)        | 5 (56%)         | 22 (59%)        |               |               |
| Male                            | 2 (40%)        | 4 (44%)         | 15 (41%)        |               |               |
| <b>Race /Ethnicity</b>          |                |                 |                 | 0.3345        | 0.4301        |
| Caucasian                       | 3 (60%)        | 8 (80%)         | 29 (81%)        |               |               |
| Hispanic                        | 0 (0%)         | 1 (10%)         | 4 (11%)         |               |               |
| Other                           | 2 (40%)        | 1 (10%)         | 3 (8%)          |               |               |
| <b>University</b>               |                |                 |                 | <b>0.0440</b> | 0.1320        |
| UCB                             | 5 (100%)       | 4 (40%)         | 17 (46%)        |               |               |
| NAU                             | 0 (0%)         | 2 (20%)         | 15 (41%)        |               |               |
| NCS                             | 0 (0%)         | 4 (40%)         | 5 (14%)         |               |               |
| <b>Use of Facial Cosmetics</b>  |                |                 |                 | 0.8882        | 0.9759        |
| Never                           | 1 (20%)        | 4 (40%)         | 13 (35%)        |               |               |
| Rarely                          | 1 (20%)        | 2 (20%)         | 4 (11%)         |               |               |
| Occasionally                    | 0 (0%)         | 0 (0%)          | 2 (5%)          |               |               |
| Regularly                       | 1 (20%)        | 0 (0%)          | 3 (8%)          |               |               |
| Daily                           | 2 (40%)        | 4 (40%)         | 15 (41%)        |               |               |

| Palm-based clusters             |                  |                   |                   |                   |                   |
|---------------------------------|------------------|-------------------|-------------------|-------------------|-------------------|
| Variables                       | Palm 1 (n=10)    | Palm 2 (n=17)     | Palm 3 (n=25)     | p value           | Corrected p       |
| <b>Number of OTUs</b>           | 1552             | 1648              | 2063              | 0.0656            | 0.1969            |
| <b>Shannon Index</b>            | 5.449            | 5.533             | 6.099             | <b>0.0288</b>     | 0.1801            |
| <b>Normalized Shannon Index</b> | 0.896            | 0.898             | 0.968             | <b>0.04</b>       | 0.1801            |
| <b>Age</b>                      | 24.200           | 22.688            | 24.480            | 0.2662            | 0.4278            |
| <b>BMI</b>                      | 22.294           | 22.414            | 23.364            | 0.8090            | 0.8090            |
| <b>Gender</b>                   |                  |                   |                   | 0.1114            | 0.2507            |
| Female                          | 7 (70%)          | 6 (37%)           | 17 (68%)          |                   |                   |
| Male                            | 3 (30%)          | 10 (63%)          | 8 (32%)           |                   |                   |
| <b>Race /Ethnicity</b>          |                  |                   |                   | 0.5395            | 0.6069            |
| Caucasian                       | 6 (60%)          | 15 (88%)          | 19 (79%)          |                   |                   |
| Hispanic                        | 2 (20%)          | 1 (6%)            | 2 (8%)            |                   |                   |
| Other                           | 2 (20%)          | 1 (6%)            | 3 (13%)           |                   |                   |
| <b>University</b>               |                  |                   |                   | 0.3488            | 0.4485            |
| UCB                             | 7 (70%)          | 8 (47%)           | 11 (44%)          |                   |                   |
| NAU                             | 1 (10%)          | 5 (29%)           | 11 (44%)          |                   |                   |
| NCS                             | 2 (20%)          | 4 (24%)           | 3 (12%)           |                   |                   |
| <b>Use of Facial Cosmetics</b>  |                  |                   |                   | 0.2852            | 0.4278            |
| Never                           | 3 (30%)          | 6 (35%)           | 9 (36%)           |                   |                   |
| Rarely                          | 2 (20%)          | 0 (0%)            | 5 (20%)           |                   |                   |
| Occasionally                    | 1 (10%)          | 1 (6%)            | 0 (0%)            |                   |                   |
| Regularly                       | 1 (10%)          | 0 (0%)            | 3 (12%)           |                   |                   |
| Daily                           | 3 (30%)          | 10 (59%)          | 8 (32%)           |                   |                   |
| Forehead-based clusters         |                  |                   |                   |                   |                   |
| Variables                       | Forehead 1 (n=8) | Forehead 2 (n=21) | Forehead 3 (n=23) | p value           | Corrected p       |
| <b>Number of OTUs</b>           | 1772             | 1771              | 1465              | 0.0579            | 0.1042            |
| <b>Shannon Index</b>            | 5.595            | 4.077             | 5.609             | <b>&lt;0.0001</b> | <b>0.0001</b>     |
| <b>Normalized Shannon Index</b> | 0.9022           | 0.8993            | 0.6704            | <b>&lt;0.0001</b> | <b>&lt;0.0001</b> |
| <b>Age</b>                      | 22.875           | 24.600            | 23.565            | 0.6866            | 0.7724            |
| <b>BMI</b>                      | 21.174           | 22.954            | 23.305            | 0.3887            | 0.4998            |
| <b>Gender</b>                   |                  |                   |                   | <b>0.0048</b>     | <b>0.0144</b>     |
| Female                          | 8 (100%)         | 7 (35%)           | 15 (65%)          |                   |                   |
| Male                            | 0                | 13 (65%)          | 8 (35%)           |                   |                   |
| <b>Race /Ethnicity</b>          |                  |                   |                   | 0.1488            | 0.2233            |
| Caucasian                       | 4 (50%)          | 16 (80%)          | 20 (87%)          |                   |                   |
| Hispanic                        | 1 (12%)          | 2 (10%)           | 2 (9%)            |                   |                   |
| Other                           | 3 (38%)          | 2 (10%)           | 1 (4%)            |                   |                   |
| <b>University</b>               |                  |                   |                   | 0.9101            | 0.9101            |
| UCB                             | 5 (63%)          | 9 (43%)           | 12 (52%)          |                   |                   |
| NAU                             | 2 (25%)          | 8 (38%)           | 7 (30%)           |                   |                   |
| NCS                             | 1 (13%)          | 4 (19%)           | 4 (17%)           |                   |                   |
| <b>Use of Facial Cosmetics</b>  |                  |                   |                   | <b>0.0361</b>     | 0.0811            |
| Never                           | 4 (50%)          | 5 (24%)           | 9 (39%)           |                   |                   |
| Rarely                          | 3 (38%)          | 1 (5%)            | 3 (13%)           |                   |                   |
| Occasionally                    | 0 (0%)           | 1 (5%)            | 1 (4%)            |                   |                   |
| Regularly                       | 1 (13%)          | 0 (0%)            | 3 (13%)           |                   |                   |
| Daily                           | 0 (0%)           | 14 (67%)          | 7 (30%)           |                   |                   |

| Body (Four body sites-based clusters) |               |               |               |               |               |
|---------------------------------------|---------------|---------------|---------------|---------------|---------------|
| Variables                             | Body 1 (n=12) | Body 2 (n=18) | Body 3 (n=22) | p value       | Corrected p   |
| <b>Number of OTUs</b>                 | 3551          | 3627          | 3221          | <b>0.0324</b> | 0.0728        |
| <b>Shannon Index</b>                  | 4.899         | 5.01          | 4.68          | <b>0.0017</b> | <b>0.0153</b> |
| <b>Normalized Shannon Index</b>       | 0.602         | 0.612         | 0.581         | <b>0.0066</b> | <b>0.0207</b> |
| <b>Age</b>                            | 21.917        | 24.944        | 24.048        | 0.4636        | 0.5961        |
| <b>BMI</b>                            | 23.912        | 22.589        | 22.585        | 0.6881        | 0.7311        |
| <b>Gender</b>                         |               |               |               | <b>0.0069</b> | <b>0.0207</b> |
| Female                                | 10 (83%)      | 13 (72%)      | 7 (33%)       |               |               |
| Male                                  | 2 (17%)       | 5 (28%)       | 14 (66%)      |               |               |
| <b>Race /Ethnicity</b>                |               |               |               | 0.7311        | 0.7311        |
| Caucasian                             | 9 (75%)       | 13 (72%)      | 18 (86%)      |               |               |
| Hispanic                              | 1 (8%)        | 3 (17%)       | 1 (5%)        |               |               |
| Other                                 | 2 (17%)       | 2 (11%)       | 2 (9%)        |               |               |
| <b>University</b>                     |               |               |               | 0.1639        | 0.2459        |
| UCB                                   | 7 (58%)       | 9 (50%)       | 10 (45%)      |               |               |
| NAU                                   | 1 (8%)        | 8 (44%)       | 8 (36%)       |               |               |
| NCS                                   | 4 (33%)       | 1 (6%)        | 4 (18%)       |               |               |
| <b>Use of Facial Cosmetics Use</b>    |               |               |               | 0.1145        | 0.2061        |
| Never                                 | 5 (42%)       | 7 (39%)       | 6 (27%)       |               |               |
| Rarely                                | 2 (17%)       | 4 (22%)       | 1 (5%)        |               |               |
| Occasionally                          | 1 (8%)        | 0 (0%)        | 1 (5%)        |               |               |
| Regularly                             | 2 (17%)       | 2 (11%)       | 0 (0%)        |               |               |
| Daily                                 | 2 (17%)       | 5 (28%)       | 14 (64%)      |               |               |

489           As noted in [13], the highest diversity in terms of the number of OTUs and the highest SI values  
490           were observed at the skin surfaces (palm and forehead) which are most exposed to contacts with the  
491           environment. However, the highest values of SI and normalized SI of all skin sites were observed for  
492           Palm 3 (SI=6.10) and Forehead 3 (SI=5.61), which demonstrated low correlation of microbiomes across  
493           the 7 weeks. The microbiomes of the forehead-based clusters were significantly affected by the use  
494           facial cosmetics (p-value 0.036), e.g., Forehead 2 is characterized by the highest percentage (67%) of  
495           members using facial cosmetics daily, relatively low value of SI=4.08, and high value of normalized SI  
496           =0.9, indicating nearly equal representation of all OTUs.

497           Gut-based and tongue-based clusters demonstrated lower diversity in terms of lower numbers  
498           of OTUs, and lower SI and normalized SI values. The lowest values of the Shannon Index were observed  
499           in Tongue 1 (SI=3.42) and Gut 1 (SI=4.69), which also demonstrated abrupt changes in microbiomes at

500 least twice in 7 weeks. The important role of the Shannon Index in predicting stability of the microbiome  
501 was already discussed in [13]; here we confirm this observation for the sites less exposed to  
502 environmental influences and identify clusters of participants with lower gut and tongue microbiome  
503 stability, which also demonstrated lower microbiome diversity. The explanation for lower diversity or  
504 stability of the microbiome in these groups of students is not clear. It might be related to race and  
505 ethnicity since the less stable clusters Gut 1 and Tongue 1 have a higher proportion of non-Caucasians  
506 and non-Hispanics (reported as race/ethnicity=other in Table 4). These clusters also have a higher  
507 proportion of students from the University of Colorado, Boulder and may be hypothetically related to  
508 some of them eating at the same places (e.g., school cafeterias). It is possible that the lower diversity  
509 and stability is caused by the actual composition of the microbiomes and its evolution over time,  
510 analysis of which would require construction of the covariance matrices (and snakes-&-dragons) not  
511 across weeks, but across OTUs, which will be the focus of our next paper. Nevertheless, having the  
512 ability to group individuals by microbiome variability instead of microbiome composition may prove to  
513 be a powerful tool in identifying disease predilection especially given the personalized nature of the  
514 human microbiome [36-37]. Future studies could also leverage our tool using case-control studies of  
515 disease with known microbiome components to determine if temporal groupings have health relevance.

516

## 517 [Clustering snakes based on macroeconomics development indicators from the](#) 518 [World Bank](#)

519 To demonstrate the use of the snake vectors approach outside of the biomedical field, we  
520 created 7x7 correlation matrices for economies of 200 countries using annual data collected by the  
521 World Bank. In particular, we looked at seven important macroeconomic indices: 1) gross domestic

522 product (GDP); 2) unemployment; 3) inflation; 4) net trade in goods; 5) labor force participation; 6)  
523 foreign direct investment; and 7) gross domestic savings. Fig 14 illustrates the results of clustering of  
524 these correlation matrices using our snake vectors approach. Each of the presented matrices are the  
525 average of the correlation matrices of the above seven macroeconomic indices across the economies  
526 belonging to the given cluster. We also fit linear regression models to assess the amount of variability  
527 ( $R^2$ ) in 170 other development indicators that could be explained by the eight cluster groups. Among  
528 those with highest  $R^2$  was annual GDP growth, which had a significant ( $p < 0.001$ ) association with the  
529 eight cluster groups and therefore may help to elucidate the different mechanisms that can drive  
530 economic growth. For example, cluster 6 had high positive correlations between GDP and  
531 unemployment, yet had the highest growth. Although initially unexpected, this result may inform novel  
532 strategies and new macroeconomic models for economic growth in developing countries such as India,  
533 Mongolia, and Egypt, all of which were in cluster 6. Thus, clustering on correlations between  
534 macroeconomic indicators may identify novel subgroups representing different economic structures.

535 **Fig 14. Correlation matrices of macroeconomic indices of eight identified clusters of**  
536 **economies.**

## 537 Conclusions

538 We presented a novel method named “snakes-&-dragons” for comparing and subtyping of  
539 complex systems through clustering of vectors derived from the correlation matrices of the variables  
540 describing these systems. Using a real dataset and a simulated dataset on brain connectivity matrices,  
541 we showed that the novel approach outperformed the existing methods for comparison of correlation  
542 matrices (RS, T-, and S-statistics). In the analysis of brain connectivity matrices from the GSP project, our  
543 approach allowed identification of two clusters with distinctly different patterns of brain connectivity

544 not explained by differences in demographic variables. In the analysis of the microbiome of healthy  
545 students, it allowed identification of clusters of students with distinctly different patterns of microbiome  
546 dynamics. It also allowed formulation of the hypothesis that stability of gut and tongue microbiomes is  
547 affected by the diversity of the microbiome (as described by the Shannon Index). The macroeconomic  
548 example illustrated the possibility of using the snakes-&-dragons approach outside of the biomedical  
549 field.

550           We have developed a clustering method capable of unsupervised classification of objects based  
551 on their structures and interactions of their parts and attributes, therefore uncovering new  
552 patterns/groupings based on previously unexplored characteristics of the systems. In medicine, it could  
553 lead to identification of new, more homogeneous subtypes of complex common diseases and  
554 subsequently to more targeted treatments. As for limitations, we have not yet demonstrated all of the  
555 capabilities of the dragon vectors. For instance, in the analysis of the microbiome data it would be  
556 meaningful to combine in a dragon vector the snake vectors formed from the correlation matrices  
557 across the weeks and the correlation matrices across the OTUs. In drug discovery, it would be  
558 informative to combine correlation matrices formed from the multidimensional time series of  
559 transcriptomics and proteomics data collected at various time points after the perturbation of a cell  
560 culture with the drugs of interest. We plan to explore these capabilities in our future research.

561           A reader of this paper may be inclined to ask, “Does it really matter how to form a snake vector,  
562 or is it just about forming a vector that includes all the elements of the upper triangle of the correlation  
563 matrix?” Our answer to this question evolved from “Not really” to “Yes and No”, and eventually to  
564 “Well, yes”, and is worth explaining here. If there is no intrinsic order of the variables upon which  
565 correlations are calculated, then the order in which correlation matrices and snakes are formed does not  
566 matter; it is important, however, that the order of variables should be the same in all correlation

567 matrices under comparison and that the order of correlation coefficients used in snake formation should  
568 be the same as well. Similarly, the concatenation of multiple snakes or other data elements in the  
569 formation of dragons should be consistent across objects. In case an intrinsic order of variables does  
570 exist, the situation is different. Take, for instance, the situation where different time points are  
571 compared as in our microbiome example; in this case, the first “off-diagonal” of the matrix  
572 demonstrates the correlations between measurements separated by one week, the second “off-  
573 diagonal” separated by two weeks, etc. Creating snakes in any other way than the serpentine of “off-  
574 diagonals” would violate this natural order. Imagine now the situation where the system has “memory”  
575 of limited duration (such as in a Markov process); in this case, the correlation matrix would look like a  
576 ribbon of nonzero elements along the diagonal and several “off-diagonals” with zeros everywhere else,  
577 so the snake vectors representing such matrices could be truncated. Another case of intrinsic order is  
578 physical distance. We believe that the snake vector approach could be useful in analysis of Hi-C data [38-  
579 40], where the conformation of DNA in the chromosomes is derived from the matrix of distances  
580 between the nucleotides or larger elements of genome. In this case, the intrinsic variable is the distance  
581 from the beginning of the DNA chain. The periodicity of the elements of the snake vectors constructed  
582 as an off-diagonal serpentine would be informative of the DNA conformation. These matrices are huge,  
583 so the truncation of the snake vectors that represent them are computationally beneficial when  
584 possible. Even more interesting is the situation where the intrinsic order is distance in 3D space, e.g., the  
585 distance from the tumor or a lesion to the multiple locations in which biomarkers are measured. In this  
586 case, a higher dimensional analog of a correlation matrix is required which should be described by  
587 objects more complex than snakes-&-dragons, bringing to mind creatures like Zmey Gorynych from  
588 Russian folk tales – a dragon with 3 heads [41].

## 589 Acknowledgements

590 Data were provided in part by the Brain Genomics Superstruct Project of Harvard University and  
591 the Massachusetts General Hospital (Principal Investigators: Randy Buckner, Joshua Roffman, and  
592 Jordan Smoller), with support from the Center for Brain Science Neuroinformatics Research Group, the  
593 Athinoula A. Martinos Center for Biomedical Imaging, and GSP Open Access Documentation the Center  
594 for Human Genetic Research. Twenty individual investigators at Harvard and MGH generously  
595 contributed data to the overall project.

596 The authors want to thank Dr. Shimony from Washington University for providing pre-processed  
597 connectivity matrices and for helpful discussions. We also thank the Washington University Alzheimer's  
598 Disease Research Center for providing normative fMRI data.



## 599 References

- 600 1. Duda RO, Hart PE, Stork DG. Pattern classification, 2nd ed. 2001. Wiley, New York.
- 601 2. Roff DA, Mousseau TA, Howard DJ. Variation in genetic architecture of calling song among  
602 populations of *Allonemobius socius*, *A. fasciatus* and a hybrid population: drift or selection?  
603 Evolution. 1999; 53:216-224.
- 604 3. Cheverud JM. Quantitative genetic analysis of cranial morphology in the cotton-top (*Saguinus*  
605 *oedipus*) and saddle-back (*S. fuscicollis*) tamarins. J Evol Biol. 1996; 9:5-42
- 606 4. Pielou EC. Probing multivariate data with random skewers: a preliminary to direct gradient  
607 analysis. Oikos. 1984; 42:161-165.
- 608 5. Garcia C. A simple procedure for the comparison of covariance matrices. BMC Evol Biol. 2012;  
609 12:222.
- 610 6. Goodnight CJ, Schwartz JM. A bootstrap comparison of genetic covariance matrices. Biometrics.  
611 1997; 53:1026-1039.
- 612 7. Calsbeek B, Goodnight CJ. Empirical comparison of G matrix test statistics: Finding biologically  
613 relevant change. Evolution. 2009; 63:2627-2635.
- 614 8. Phillips PC, Arnold SJ. Hierarchical comparison of genetic variance-covariance matrices. I. Using the  
615 Flury hierarchy. Evolution. 1999; 53:1506-1515.
- 616 9. Flury B. Common principal components and related multivariate models. 1988. John Wiley & Sons.
- 617 10. Haber A. A comparative analysis of integration indices. Evol Biol. 2011; 38:476-488.
- 618 11. Barabasi A-L, Oltvai ZN. Network Biology: Understanding the cell's functional organization. Nature  
619 Reviews. Genetics. 2004; 5:101.

- 620 12. Holmes AJ, Hollinshead M, O'Keefe TM, Petrov VI, Fariello GR, Wald LL, et al. Brain Genomics  
621 Superstruct Project initial data release with structural, functional, and behavioral measures.  
622 Scientific data. 2015; 2: 150031.
- 623 13. Flores GE, Caporaso JG, Henley JB, Rideout JR, Domogala D, Chase J, et al. Temporal variability is a  
624 personalized feature of the human microbiome. *Genome Biology*. 2014; 15:531.
- 625 14. The World Bank 2016. World development indicators. Washington, DC: The World Bank (producer  
626 and distributor). Available at: [http://data.worldbank.org/data-catalog/world-development-](http://data.worldbank.org/data-catalog/world-development-indicators)  
627 [indicators](http://data.worldbank.org/data-catalog/world-development-indicators). Accessed 9/21/16.
- 628 15. Calinski RB, Harabasz J. A dendrite method for cluster analysis. *Commun Stat*. 1974; 3:1-27.
- 629 16. Rouseeuw PJ. Silhouettes: A graphical aid to the interpretation and validation of cluster analysis. *J*  
630 *Comput Appl Math*. 1987; 20(1):53-65.
- 631 17. Halkidi M, Batistakis Y, Vazirgiannis M. On clustering validation techniques. *J Intell Inf Syst*. 2001;  
632 17:107.
- 633 18. Andreev VP, Gillespie BW, Helfand BT, Merion RM. Misclassification errors in unsupervised  
634 classification methods. Comparison based on the simulation of targeted proteomics data. *J*  
635 *Proteomics Bioinform*. 2016; S14:005.
- 636 19. Liao TW. Clustering of time series data -a survey. *Pattern Recognit*. 2005; 38:1857-1874.
- 637 20. Biswal B, Yetkin FZ, Haughton VM, Hyde JS. Functional connectivity in the motor cortex of resting  
638 human brain using echo-planar MRI. *Magn Reson Med*. 1995; 34: 537–541.
- 639 21. Uddin LQ, Menon V. Introduction to special topic – resting state brain activity: implications for  
640 systems neuroscience. *Frontiers in Systems Neuroscience*. 2010; 4: 5-6.
- 641 22. Fox MD, Greicius M. Clinical applications of resting state functional connectivity. *Frontiers in*  
642 *Systems Neuroscience*. 2010; 4:126-134.

- 643 23. Andrews-Hanna JR, Snyder A Z, Vincent JL, Lustig C, Head D, Raichle ME, Buckner RL. Disruption of  
644 large-scale brain systems in advanced aging. *Neuron*. 2007; 56: 924–935.
- 645 24. Langan J, Peltier SJ, Bo J, Fling BW, Welsh RC, Seidler RD. Functional implications of age differences  
646 in motor system connectivity. *Frontiers in Systems Neuroscience*. 2010; 4:78-88.
- 647 25. Hacker CD, Laumann TO, Szrama NP, Baldassarre A, Snyder AZ, Leuthardt EC, et al. Resting state  
648 network estimation in individual subjects. *Neuroimage*. 2013; 82:616-633.
- 649 26. Fox MD, Raichle ME. Spontaneous fluctuations in brain activity observed with functional magnetic  
650 resonance imaging. *Nat Rev Neurosci*. 2007; 8: 700–711.
- 651 27. Power JD, Mitra A, Laumann TO, Snyder AZ, Schlaggar BL, Petersen SE. Methods to detect,  
652 characterize, and remove motion artifact in resting state fMRI. *NeuroImage*. 2014;84:320-41.
- 653 28. Cheverud JM, Marroig G. Comparing covariance matrices: random skewers method compared to  
654 the common principal components model. *Genet Mol Biol* 2007; 30(2):461-469.
- 655 29. Sun SY, Liu ZP, Zeng T, Wang Y, Chen L. Spatio-temporal analysis of type 2 diabetes mellitus based  
656 on differential expression networks. *Scientific Reports*. 2013; 3:2268.
- 657 30. Albert R, Barabasi AL. Statistical mechanics of complex networks. *Reviews of Modern Physics*.  
658 2002; 74:47-97.
- 659 31. Dolnicar S. A review of unquestioned standards in using cluster analysis for data-driven market  
660 segmentation. CD Conference Proceedings of the Australian and New Zealand Marketing Academy  
661 Conference 2002 (ANZMAC 2002). Deakin University, Melbourne, December 2-4, 2002.
- 662 32. Monti S, Tamayo P, Mesirov J, Golub T. Consensus clustering : A resampling-based method for  
663 class discovery and visualization of gene expression microarray data. *Machine Learning*. 2003;  
664 52:91-118.
- 665 33. Schafer J, Strimmer K. A shrinkage approach to large-scale covariance matrix estimation and  
666 implications for functional genomics. *Stat Appl Genet Mol Biol*. 2005; 4:32.

- 667 34. Benjamini Y, Hochberg Y. Controlling the false discovery rate - a practical and powerful approach  
668 to multiple testing. *J Royal Statistical Society, Ser B.* 1995; 57:289-300.
- 669 35. Magurran A. *Measuring Biological Diversity.* Oxford: Blackwell Publishing; 2004.
- 670 36. Turnbaugh PJ, Ley RE, Hamady M, Frazer-Liggett CM, Knight R, Gordon JI. The human microbiome  
671 project. *Nature.* 2007; 449:804-10.
- 672 37. Costello EK, Lauber CL, Hamady M, Frierer N, Gordon JI, Knight R. Bacterial community variation in  
673 human body habitats across space and time. *Science.* 2009; 326: 1694-7.
- 674 38. Dekker J, Marti-Renom MA, Mirny LA. Exploring the three-dimensional organization of genomes:  
675 interpreting chromatin interaction data. *Nat Rev Genet.* 2013; 14(6):390-403.
- 676 39. Yaffe E, Tanay A. Probabilistic modeling of Hi-C contact maps eliminates systematic biases to  
677 characterize global chromosomal architecture. *Nature Genetics.* 2011; 43:1059-1065.
- 678 40. Flot J-F, Marie-Nelly H, Koszul R. Contact genomics: scaffolding and phasing (meta)genomes using  
679 chromosome 3D physical signatures. *FEBS Letters.* 2015; 589: 2966-2974.
- 680 41. [https://en.wikipedia.org/wiki/Slavic\\_dragon](https://en.wikipedia.org/wiki/Slavic_dragon)

681

682

683

684

685

686

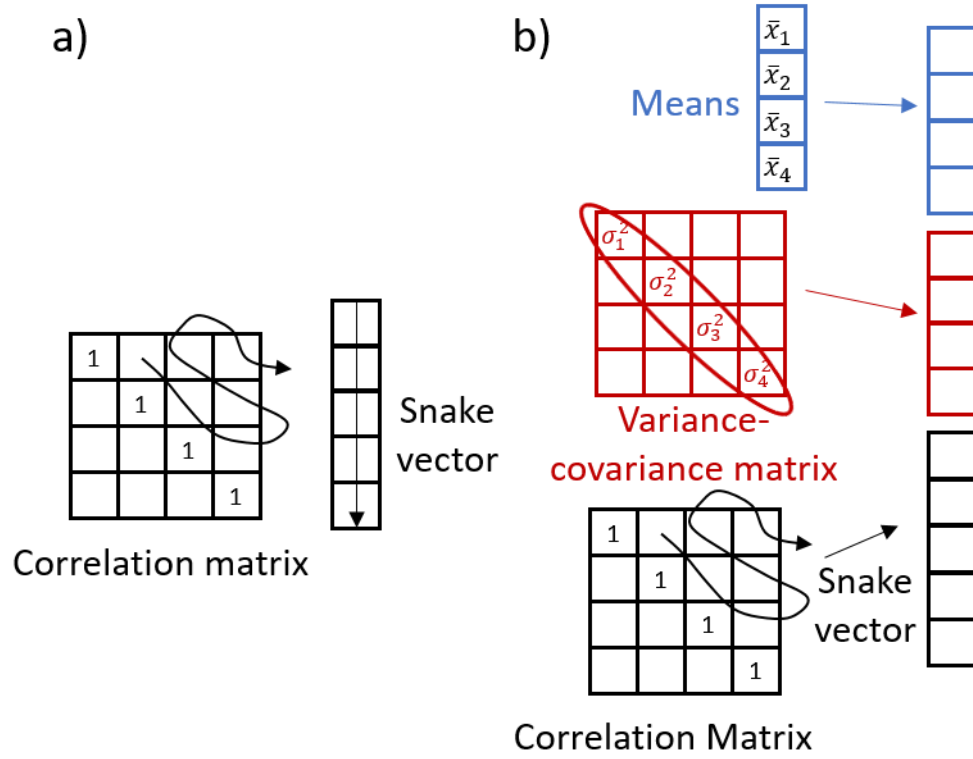

Fig 1. Explanation of snakes-&-dragons approach: a)-snake vector. b)-dragon vector.

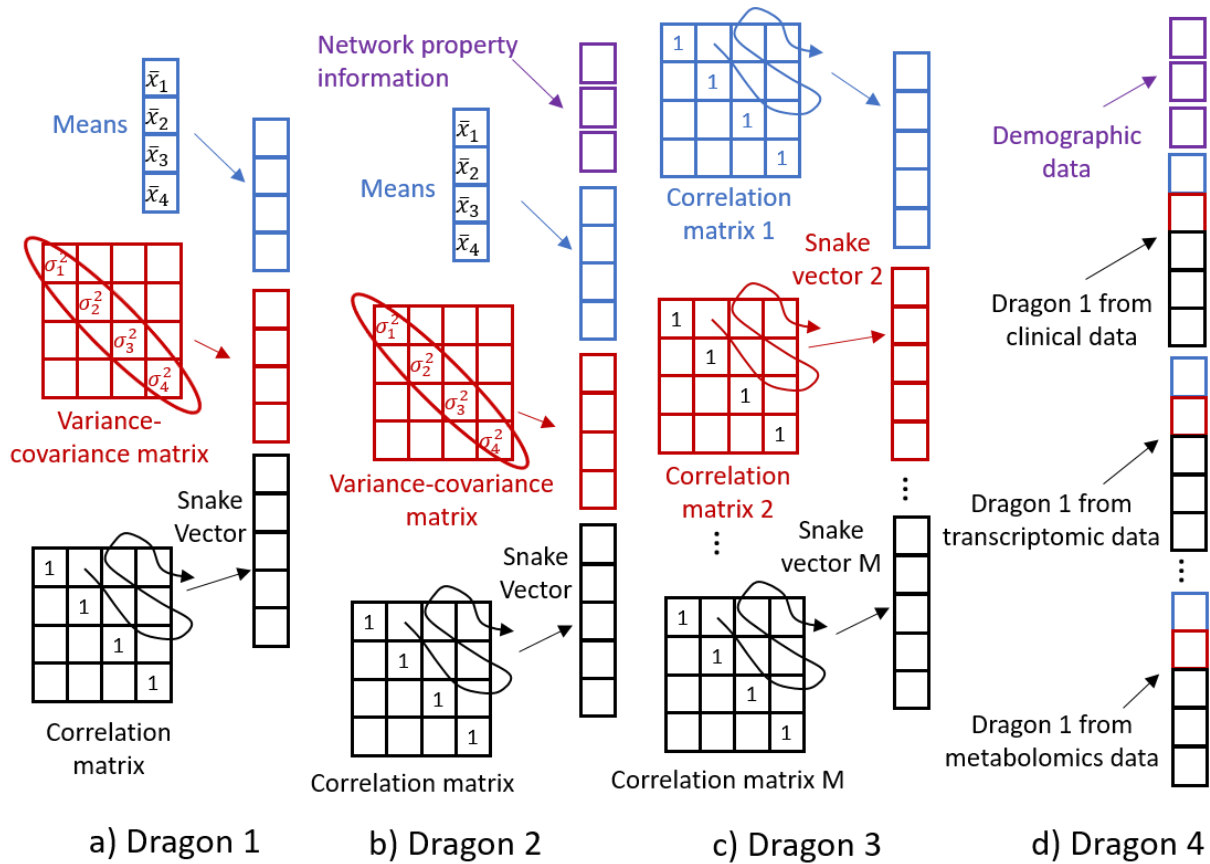

Fig 2. Four types of dragon vectors: a) - Dragon 1, includes means and variances of the variables; b) - Dragon 2, includes also overall network property information; c) - Dragon 3, combines correlations along multiple dimensions of the data matrix or multiple locations; d) - Dragon 4 is composed of several dragons presenting different types of clinical and omics data.

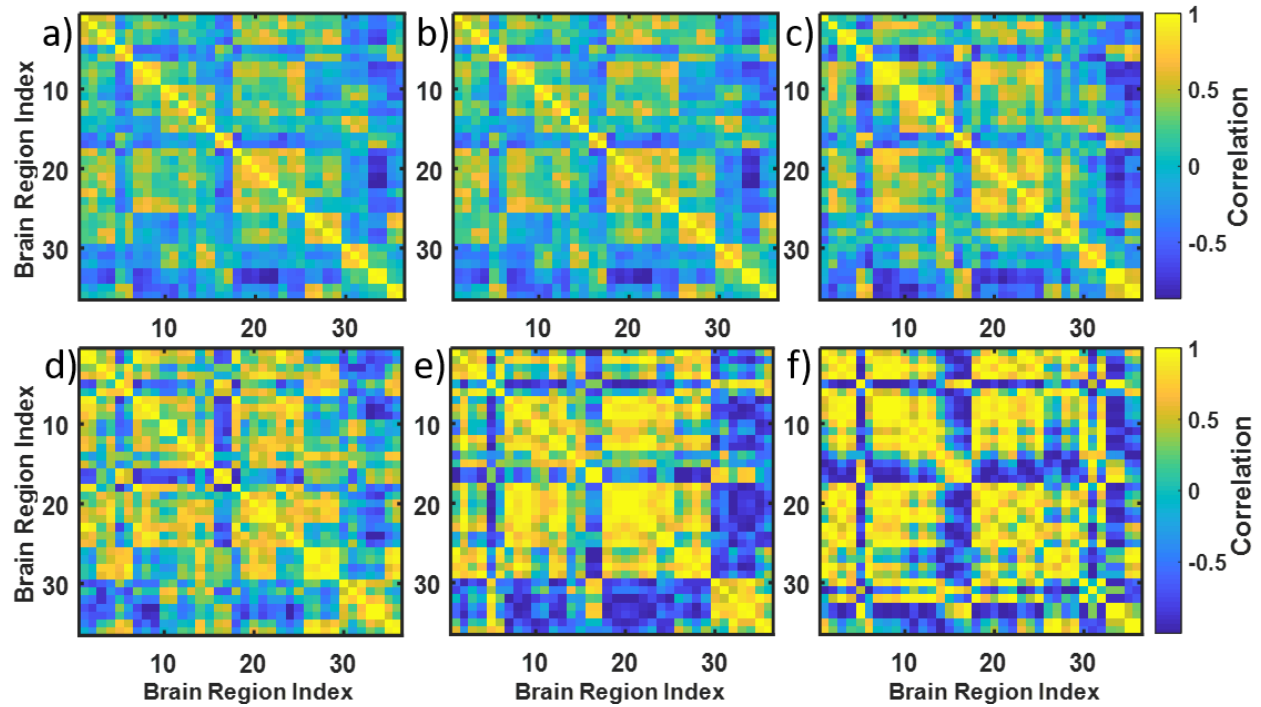

Fig 3. Simulating connectivity matrices with increased noise level: a) - original matrix #1. b) - simulated matrix with  $q/n=0.1$ ,  $n=360$ ; C -  $q/n=3$ ,  $n=12$ ; D-  $q/n=6$ ,  $n=6$ ; E- $q/n=9$ ,  $n=4$ ; F-  $q/n=12$ ,  $n=3$ .

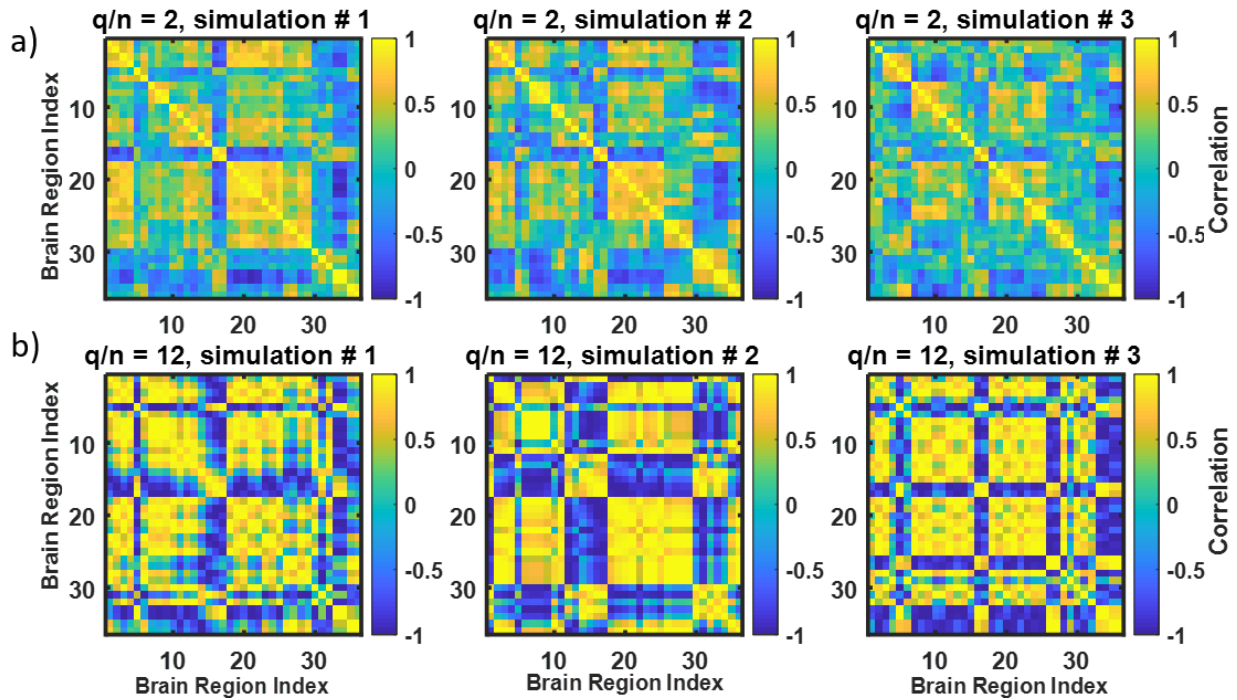

Fig 4. Increased variability of simulated correlation matrices with increased  $q/n$  value: a) - 3 instances of correlation matrices generated from the connectivity matrix #1 using  $q/n=2$ ,  $n=18$ ; b) - 3 instances of correlation matrices generated from the connectivity matrix #1 using  $q/n=12$ ,  $n=3$ . See how variability of the matrices is increased in B ( $q/n=12$ ) versus A ( $q/n=2$ ).



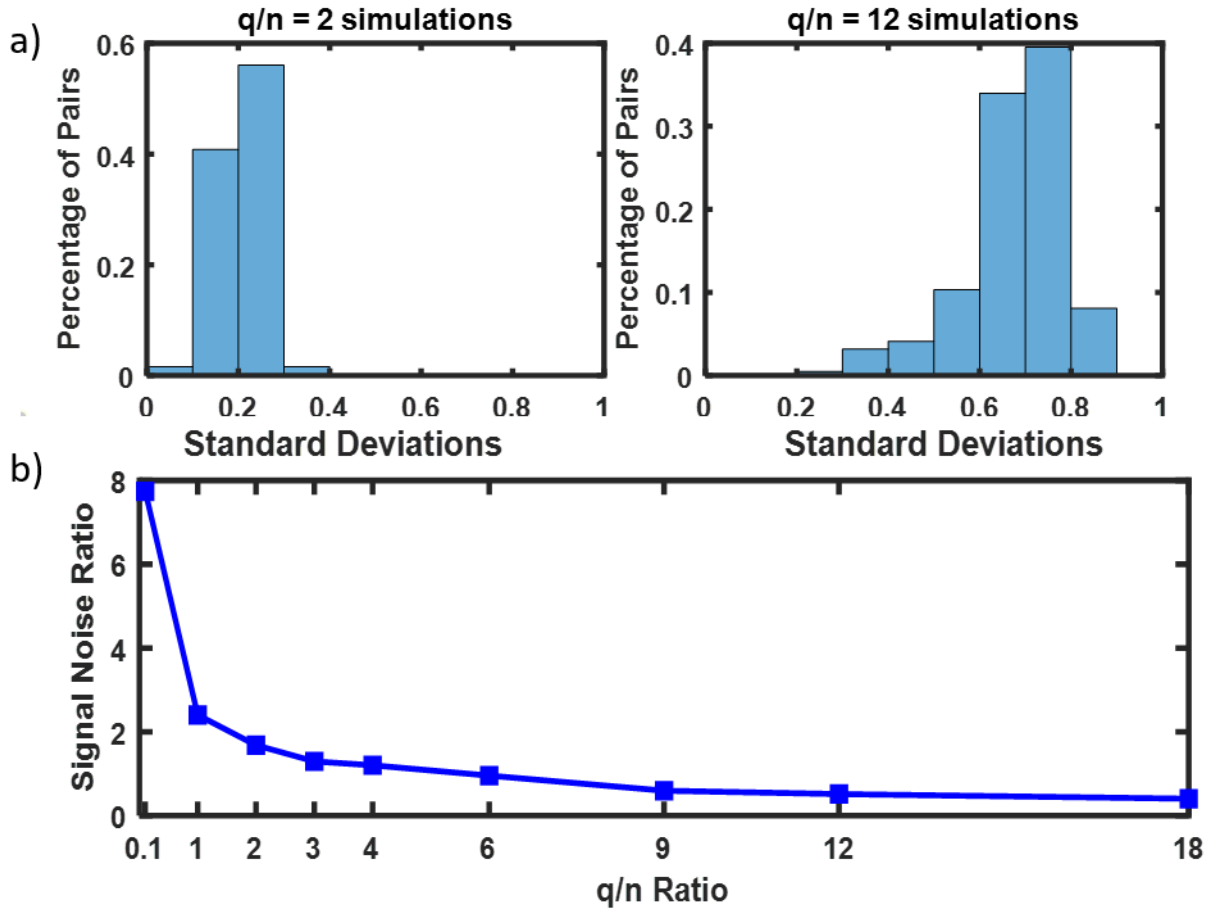

Fig 5. Explanation of increased variability of the simulated matrices: a) - histograms of standard deviations of the elements of the simulated connectivity matrices for various  $q/n$ ; b) - signal to noise ratio vs.  $q/n$ .

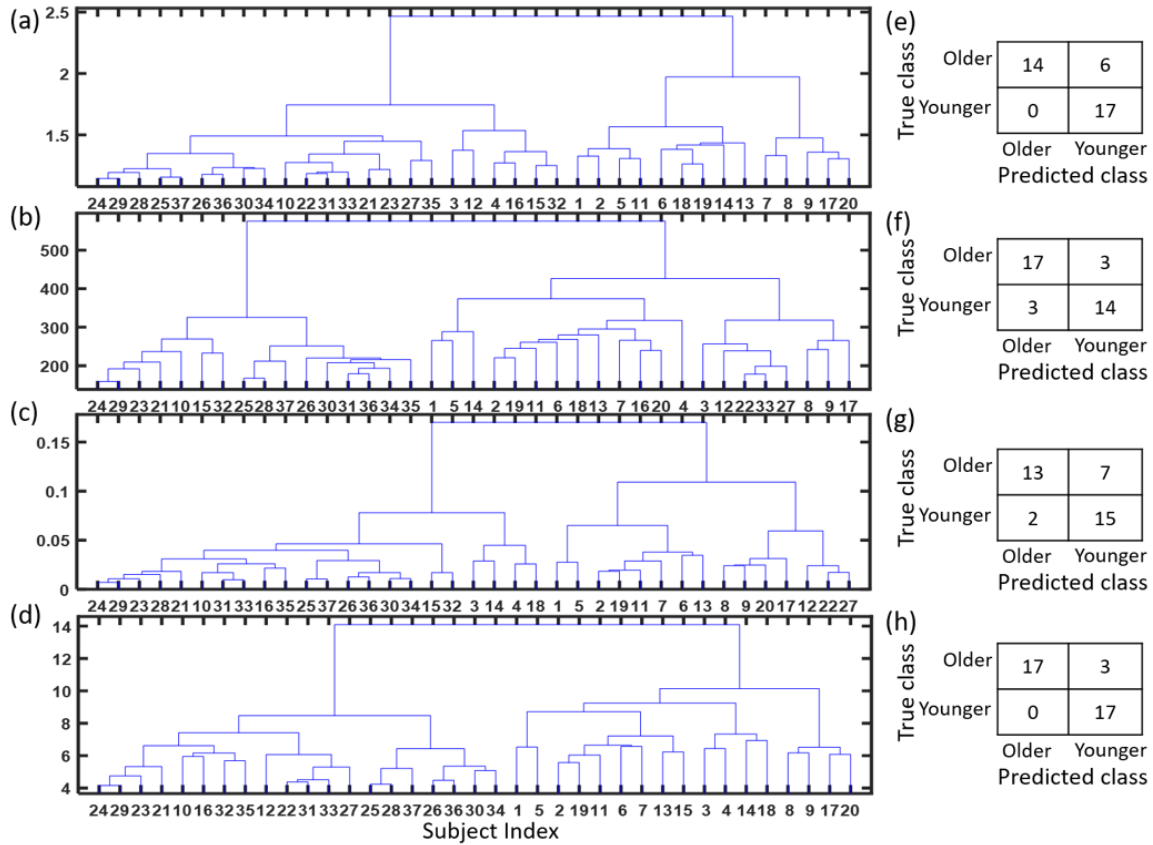

Fig 6. Clustering of brain connectivity matrices from pilot data set of young vs. old healthy persons: a) - dendrogram based on RS, b) - dendrogram based on T-statistics, c) - dendrogram based on S-statistics, d) - dendrogram based on snake vectors, E-H- confusion matrices for the above four approaches.

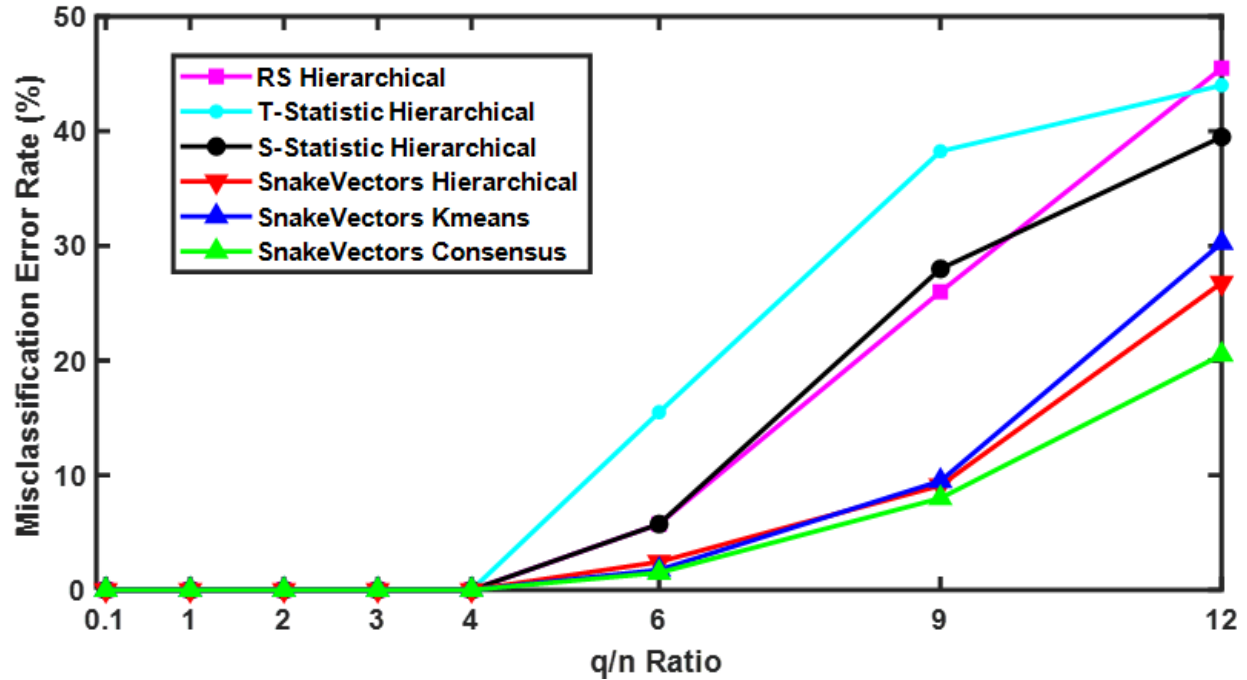

Fig 7. Misclassification error in clustering simulated connectivity matrices. Comparison of hierarchical clustering results for RS, T- and S-statistics, and snakes vectors, with k-means and resampling-based consensus clustering using snake vectors. Snake vectors based approaches outperform RS, T- and S-statistics based ones.

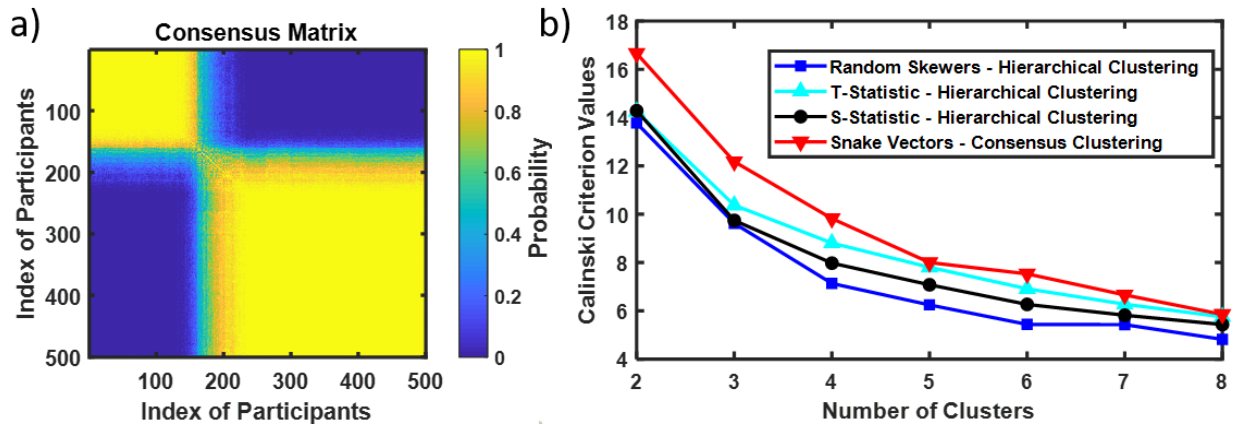

Fig 8. Resampling-based consensus clustering of 500 brain connectivity matrices from GSP project: a) - Consensus matrix. Two identified clusters are presented as yellow squares (yellow color indicating the high probability of a pair of brains belonging to the same cluster). High contrast in the on-diagonal and off-diagonal values of probability indicate two clusters; b) - Checking the number of clusters with Calinski criterion. Calinski criterion have a maximum at  $k=2$  indicating two clusters as well (both with snakes-&-dragons approach and with RS, T- and S-statistics).

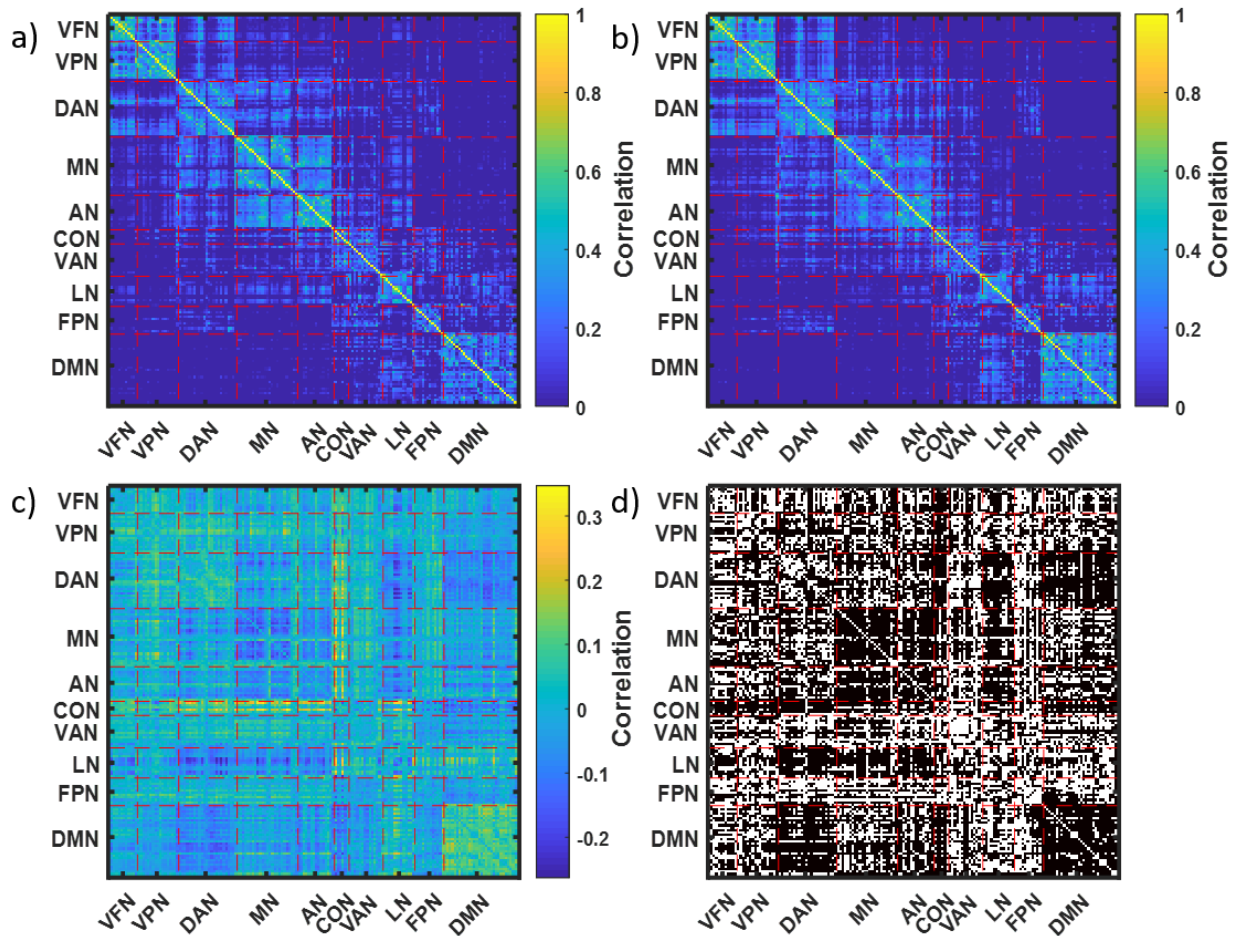

Fig 9. Mean brain connectivity matrices for two clusters identified in GSP data: a) - Mean connectivity matrix for cluster 1, b) - Mean connectivity matrix for cluster 2, c) - Difference of mean connectivity matrices for cluster 2 and cluster 1, d) - 8395 significantly different values of connectivity observed in cluster 1 vs. cluster 2. The 169 brain areas were divided into 10 networks: visual foveal (VFN), visual peripheral (VPN), dorsal attention (DAN), motor (MN), auditory (AN), cingulo-opercular (CON), ventral attention (VAN), language (LN), fronto-parietal (FPN), and default mode (DMN) [26].

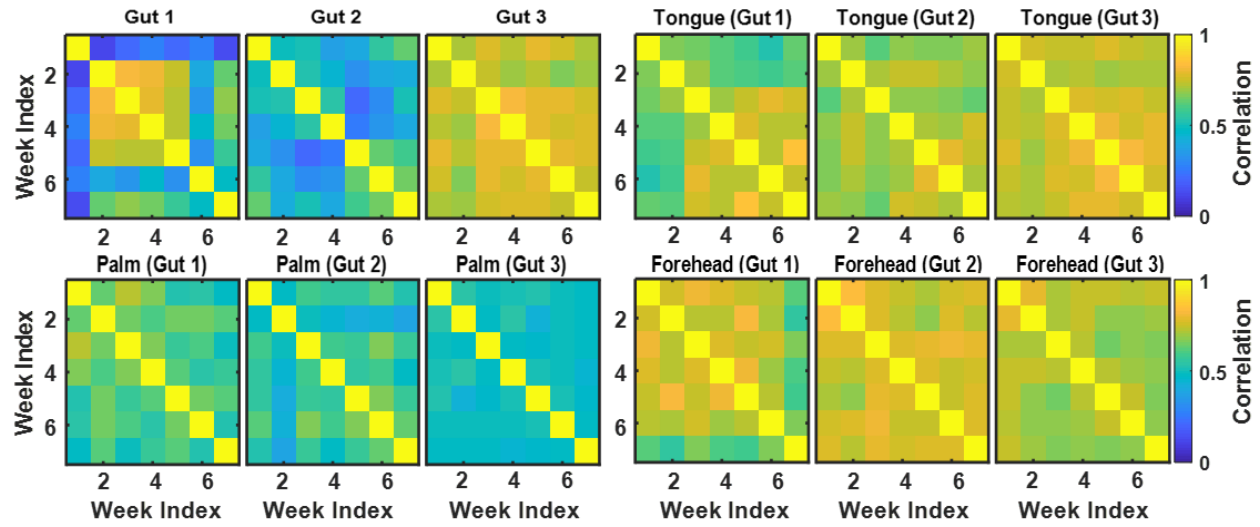

Fig 10. Correlation matrices reflecting microbiome dynamics at four body sites (gut, tongue, palm, and forehead) for three clusters of students identified based on the gut microbiome data.

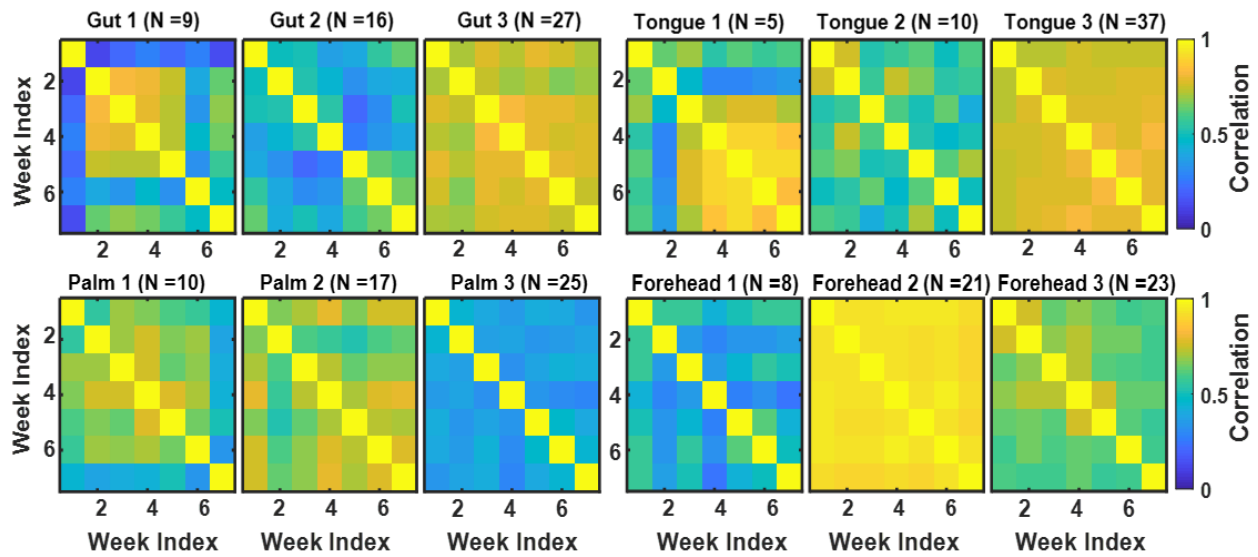

Fig 11. Correlation matrices reflecting microbiome dynamics at four body sites (gut, tongue, palm, and forehead) for three clusters of students identified based on the microbiome data for each of the body sites.

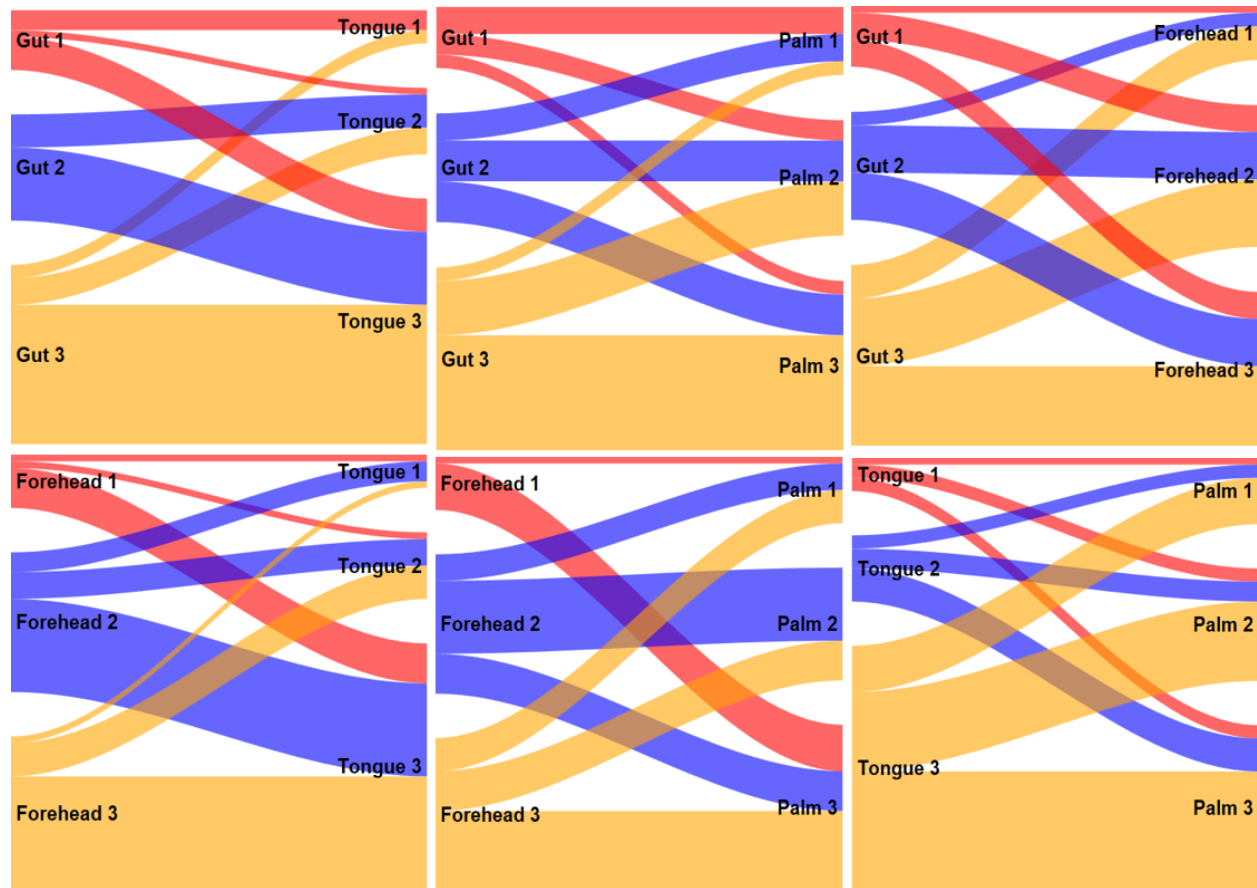

Fig 12. Pairwise comparison of cluster membership across four body sites.



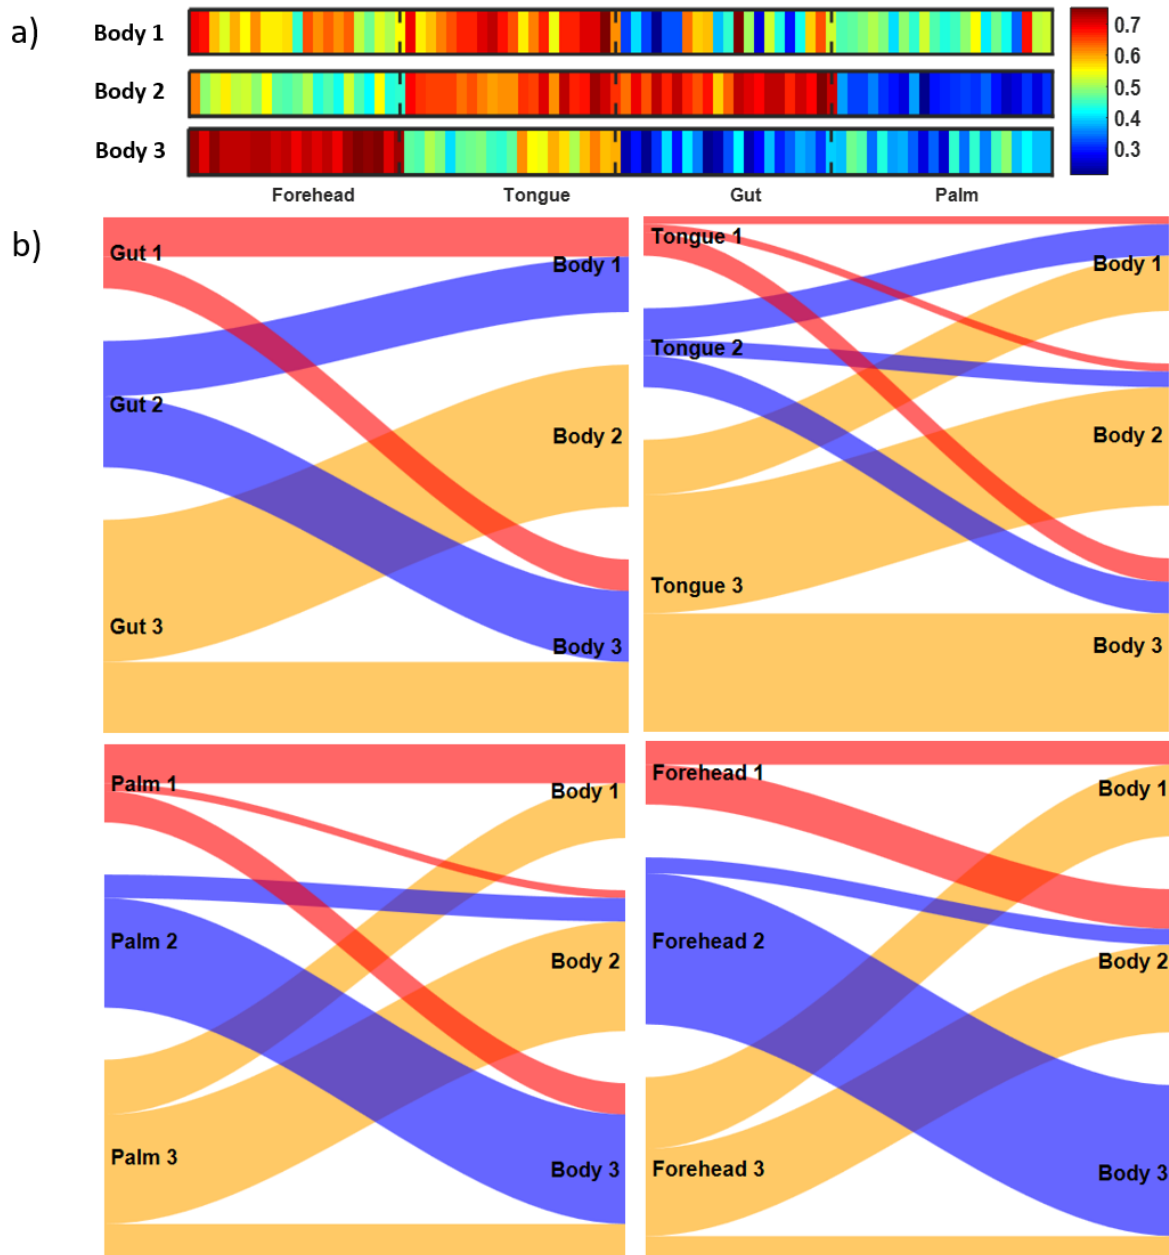

Fig 13. Clustering based on dragon vectors describing microbiomes of four body sites: a) - Mean dragon vectors for three clusters of students identified by clustering the concatenated snake vectors for gut, tongue, palm, and forehead; b) - Sankey diagrams comparing cluster membership based on the dynamics of microbiomes at each site and all four sites' microbiomes combined.

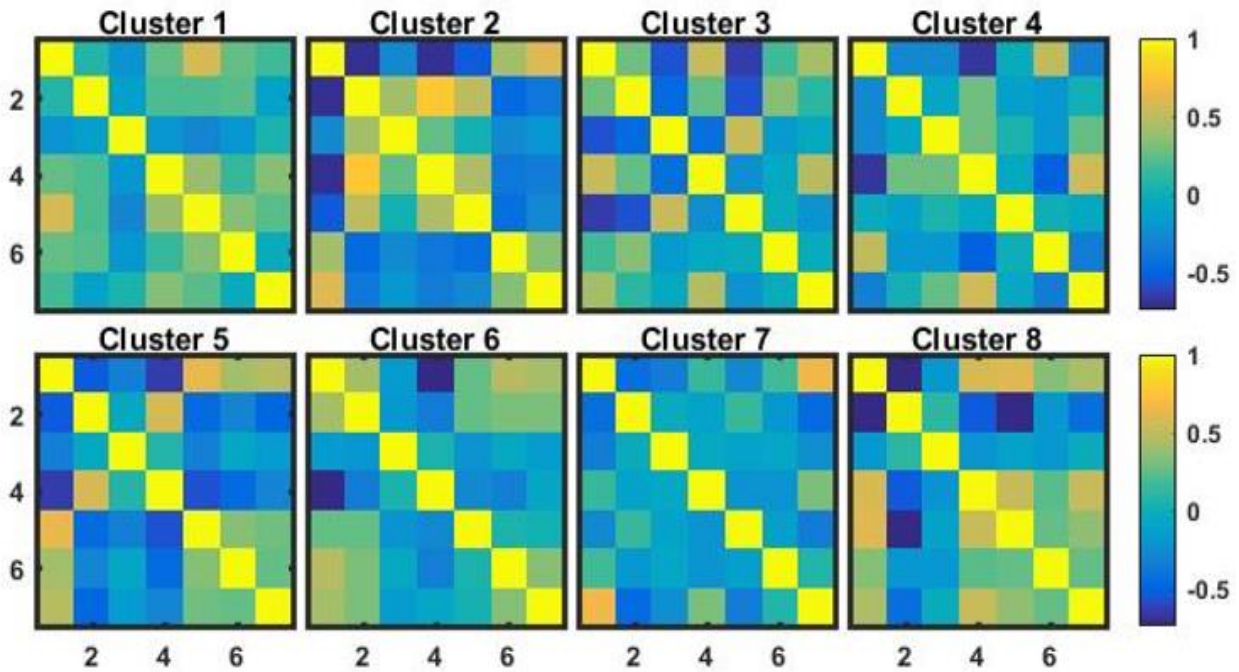

Fig 14. Correlation matrices of macroeconomic indices of eight identified clusters of economies.
